# Supplementary material for: The adaptive evolution of cancer driver genes
Source: Springer Nature journal article supplement (doi:10.1186/s12864-023-09301-9), 2023-04-25
Supplement: MOESM1 [file 12864_2023_9301_MOESM1_ESM.pdf]

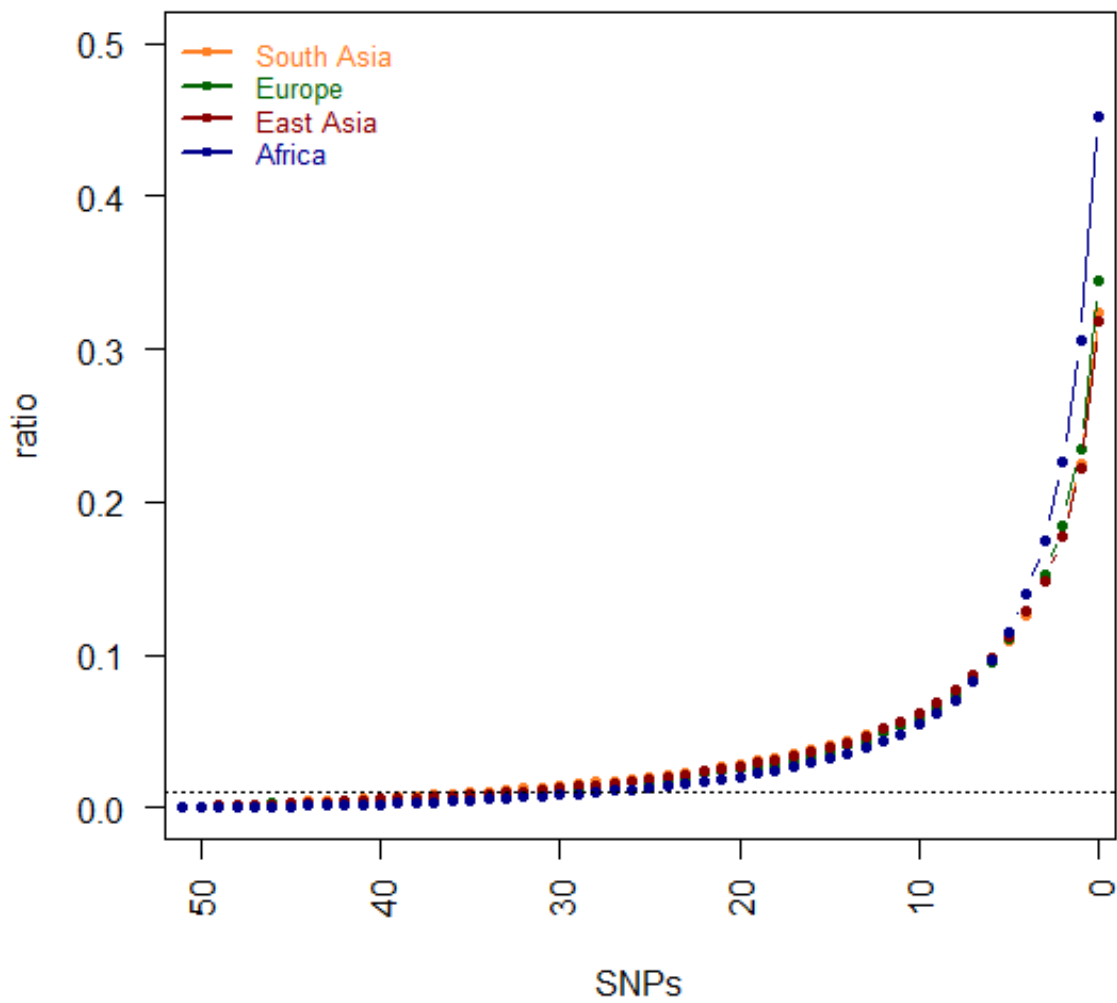

**Figure S1** The distribution of the number of SNPs with large  $|iHS|$  values in a 51-SNPs window across the genome. X-axis represents the number of SNPs with  $|iHS| > 2$  in a 51-SNPs window. Y-axis represents top ratio across the genome. Top 1% was set as the threshold.

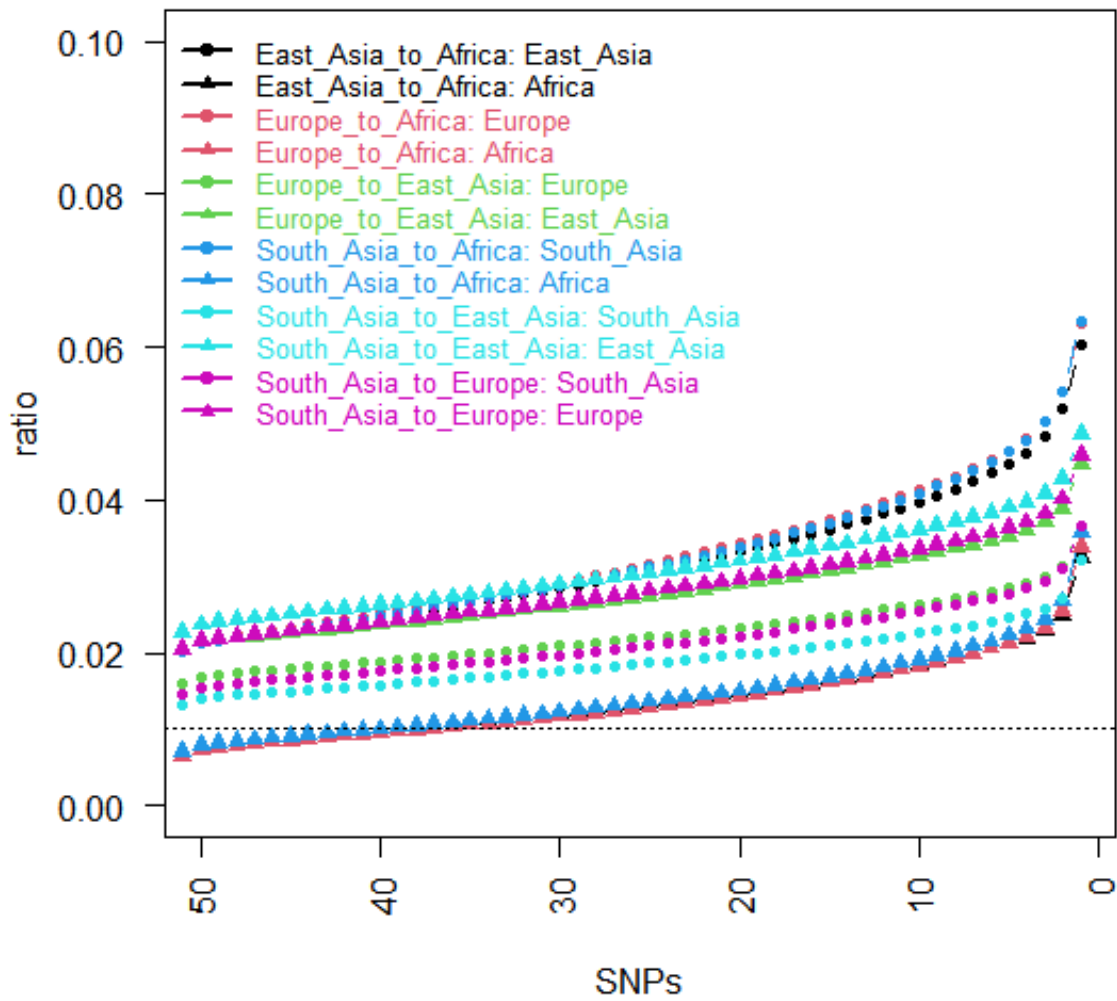

**Figure S2** The distribution of the number of SNPs with large  $|xpEHH|$  values in a 51-SNPs window across the genome. X-axis represents the number of SNPs with  $|xpEHH| > 2$  in a 51-SNPs window. Y-axis represents top ratio across the genome. Top 1% was set as the threshold.
