# Supplementary material for: The adaptive evolution of cancer driver genes
Source: Springer Nature journal article supplement (doi:10.1186/s12864-023-09301-9), 2023-04-25
Supplement: MOESM2 [file 12864_2023_9301_MOESM2_ESM.pdf]

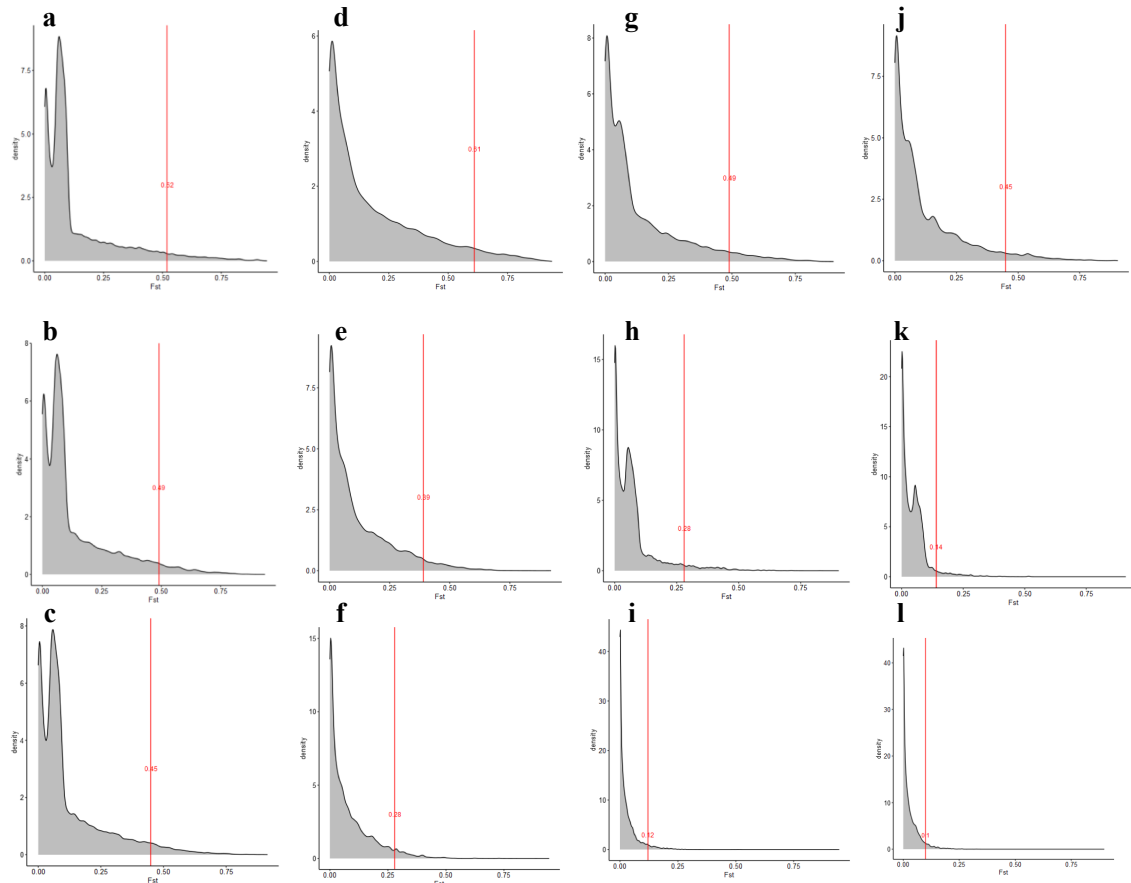

**Figure S1** Pairwise  $F_{ST}$  distributions. The top 5% thresholds were given. (a) comparisons between the African population and the East Asian population for allele 1 falling into the allele frequency bin between 0.05-0.10 in the African population; (b) comparisons between the African population and the European population for allele 1 falling into the allele frequency bin between 0.05-0.10 in the African population; (c) comparisons between the African population and the South Asian population for allele 1 falling into the allele frequency bin between 0.05-0.10 in the African population; (d) comparisons between the East Asian population and the African population for allele 1 falling into the allele frequency bin between 0.05-0.10 in the East Asian population; (e) comparisons between the East Asian population and the European population for allele 1 falling into the allele frequency bin between 0.05-0.10 in the East Asian population; (f) comparisons between the East Asian population and the South Asian population for allele 1 falling into the allele frequency bin between 0.05-0.10 in the East Asian population; (g) comparisons between the European population and the African population for allele 1 falling into the allele frequency bin between 0.05-0.10 in the European population; (h) comparisons between the European population and the East Asian population for allele 1 falling into the allele frequency bin between 0.05-0.10 in the European population; (i) comparisons between the European population and the South Asian population for allele 1 falling into the allele frequency bin between 0.05-0.10 in the European population; (j) comparisons between the South Asian population and the African population for allele 1 falling into the allele frequency bin between 0.05-0.10 in the South Asian population; (k) comparisons between the South Asian population and the East Asian population for allele 1 falling into the allele frequency bin between 0.05-0.10 in the South Asian population; (l) comparisons between the South Asian population and the European population for allele 1 falling into the allele frequency bin between 0.05-0.10 in the South Asian population.

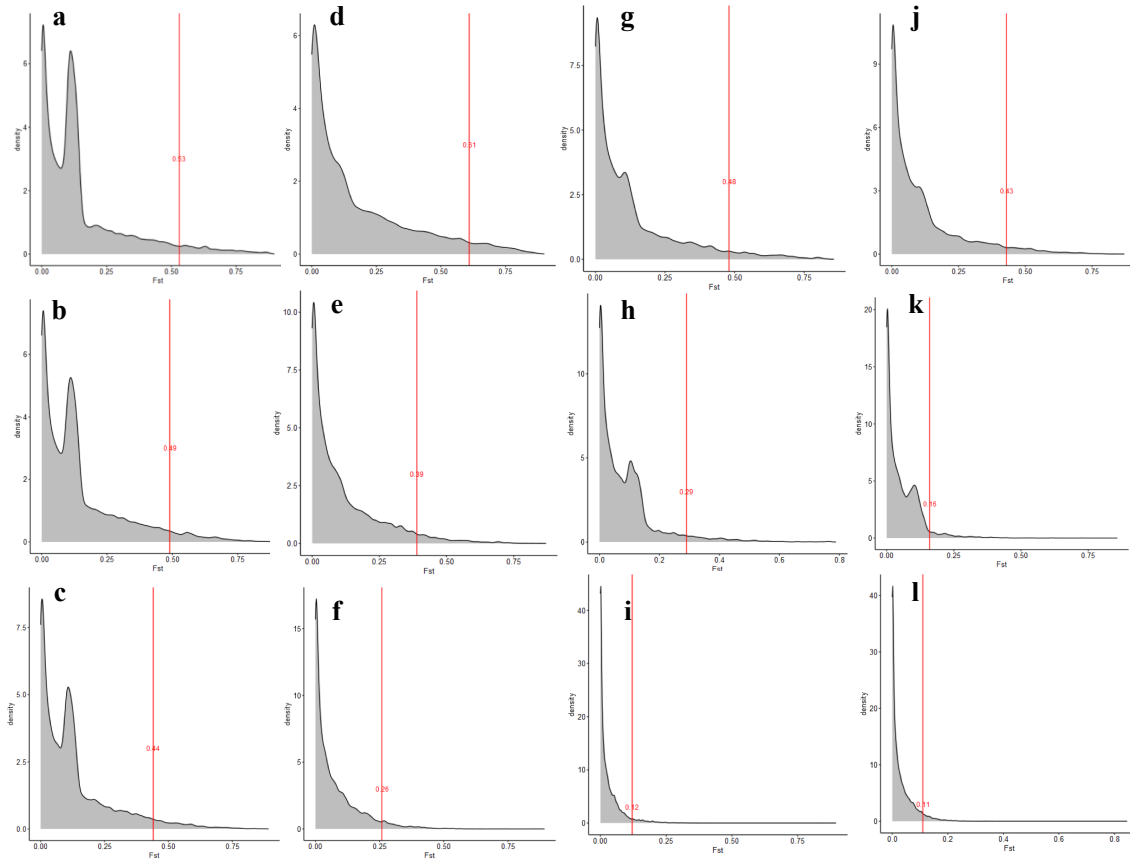

**Figure S2** Pairwise  $F_{ST}$  distributions. The top 5% thresholds were given. (a) comparisons between the African population and the East Asian population for allele 1 falling into the allele frequency bin between 0.10-0.15 in the African population; (b) comparisons between the African population and the European population for allele 1 falling into the allele frequency bin between 0.10-0.15 in the African population; (c) comparisons between the African population and the South Asian population for allele 1 falling into the allele frequency bin between 0.10-0.15 in the African population; (d) comparisons between the East Asian population and the African population for allele 1 falling into the allele frequency bin between 0.10-0.15 in the East Asian population; (e) comparisons between the East Asian population and the European population for allele 1 falling into the allele frequency bin between 0.10-0.15 in the East Asian population; (f) comparisons between the East Asian population and the South Asian population for allele 1 falling into the allele frequency bin between 0.10-0.15 in the East Asian population; (g) comparisons between the European population and the African population for allele 1 falling into the allele frequency bin between 0.10-0.15 in the European population; (h) comparisons between the European population and the East Asian population for allele 1 falling into the allele frequency bin between 0.10-0.15 in the European population; (i) comparisons between the European population and the South Asian population for allele 1 falling into the allele frequency bin between 0.10-0.15 in the European population; (j) comparisons between the South Asian population and the African population for allele 1 falling into the allele frequency bin between 0.10-0.15 in the South Asian population; (k) comparisons between the South Asian population and the East Asian population for allele 1 falling into the allele frequency bin between 0.10-0.15 in the South Asian population; (l) comparisons between the South Asian population and the European population for allele 1 falling into the allele frequency bin between 0.10-0.15 in the South Asian population.

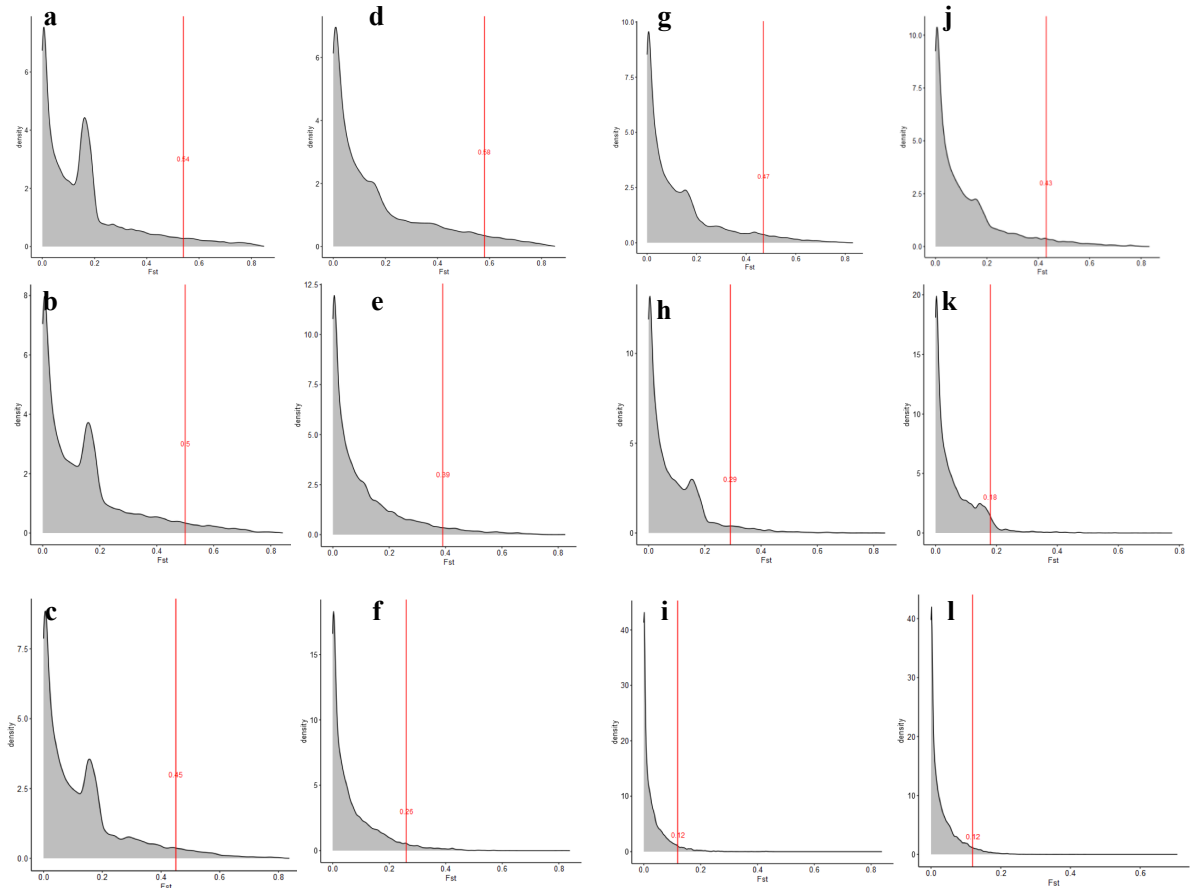

**Figure S3** Pairwise  $F_{ST}$  distributions. The top 5% thresholds were given. (a) comparisons between the African population and the East Asian population for allele 1 falling into the allele frequency bin between 0.15-0.20 in the African population; (b) comparisons between the African population and the European population for allele 1 falling into the allele frequency bin between 0.15-0.20 in the African population; (c) comparisons between the African population and the South Asian population for allele 1 falling into the allele frequency bin between 0.15-0.20 in the African population; (d) comparisons between the East Asian population and the African population for allele 1 falling into the allele frequency bin between 0.15-0.20 in the East Asian population; (e) comparisons between the East Asian population and the European population for allele 1 falling into the allele frequency bin between 0.15-0.20 in the East Asian population; (f) comparisons between the East Asian population and the South Asian population for allele 1 falling into the allele frequency bin between 0.15-0.20 in the East Asian population; (g) comparisons between the European population and the African population for allele 1 falling into the allele frequency bin between 0.15-0.20 in the European population; (h) comparisons between the European population and the East Asian population for allele 1 falling into the allele frequency bin between 0.15-0.20 in the European population; (i) comparisons between the European population and the South Asian population for allele 1 falling into the allele frequency bin between 0.15-0.20 in the European population; (j) comparisons between the South Asian population and the African population for allele 1 falling into the allele frequency bin between 0.15-0.20 in the South Asian population; (k) comparisons between the South Asian population and the East Asian population for allele 1 falling into the allele frequency bin between 0.15-0.20 in the South Asian population; (l) comparisons between the South Asian population and the European population for allele 1 falling into the allele frequency bin between 0.15-0.20 in the South Asian population.

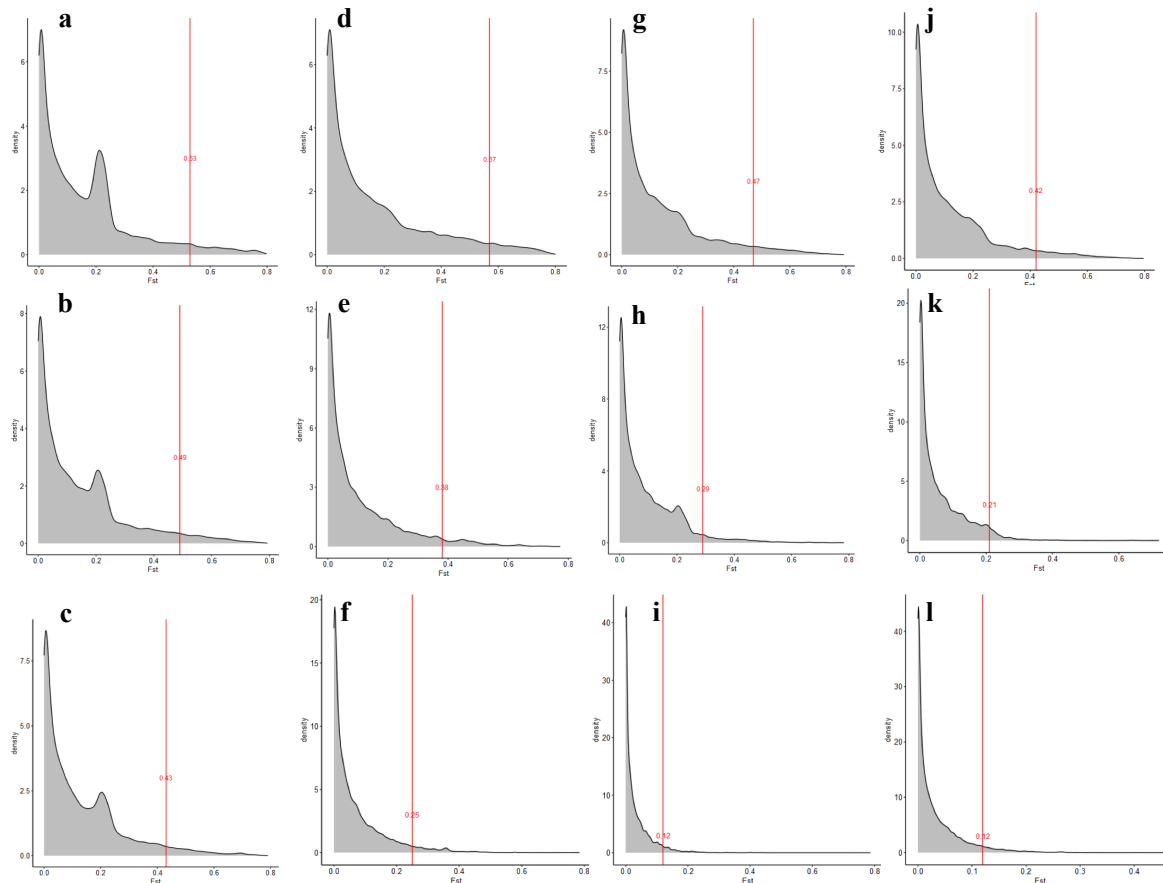

**Figure S4** Pairwise  $F_{ST}$  distributions. The top 5% thresholds were given. (a) comparisons between the African population and the East Asian population for allele 1 falling into the allele frequency bin between 0.20-0.25 in the African population; (b) comparisons between the African population and the European population for allele 1 falling into the allele frequency bin between 0.20-0.25 in the African population; (c) comparisons between the African population and the South Asian population for allele 1 falling into the allele frequency bin between 0.20-0.25 in the African population; (d) comparisons between the East Asian population and the African population for allele 1 falling into the allele frequency bin between 0.20-0.25 in the East Asian population; (e) comparisons between the East Asian population and the European population for allele 1 falling into the allele frequency bin between 0.20-0.25 in the East Asian population; (f) comparisons between the East Asian population and the South Asian population for allele 1 falling into the allele frequency bin between 0.20-0.25 in the East Asian population; (g) comparisons between the European population and the African population for allele 1 falling into the allele frequency bin between 0.20-0.25 in the European population; (h) comparisons between the European population and the East Asian population for allele 1 falling into the allele frequency bin between 0.20-0.25 in the European population; (i) comparisons between the European population and the South Asian population for allele 1 falling into the allele frequency bin between 0.20-0.25 in the European population; (j) comparisons between the South Asian population and the African population for allele 1 falling into the allele frequency bin between 0.20-0.25 in the South Asian population; (k) comparisons between the South Asian population and the East Asian population for allele 1 falling into the allele frequency bin between 0.20-0.25 in the South Asian population; (l) comparisons between the South Asian population and the European population for allele 1 falling into the allele frequency bin between 0.20-0.25 in the South Asian population.

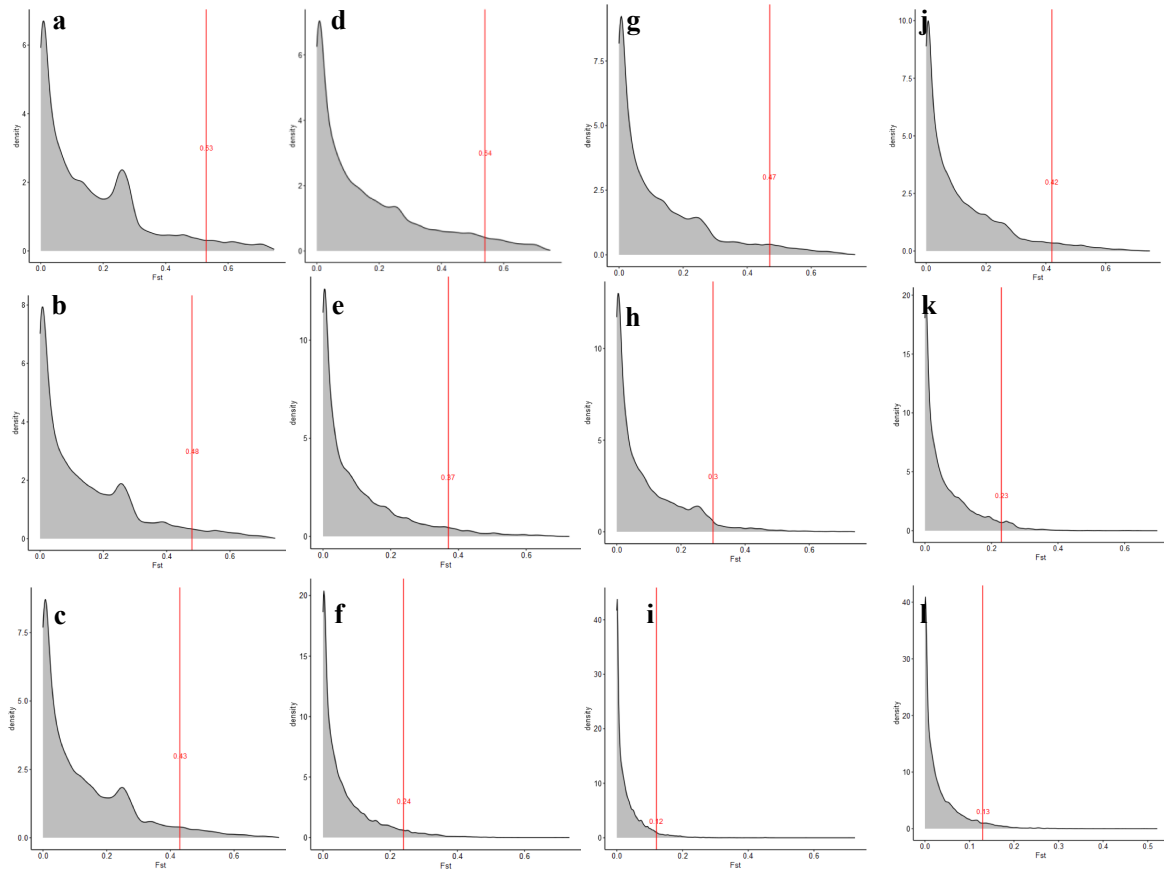

**Figure S5** Pairwise  $F_{ST}$  distributions. The top 5% thresholds were given. (a) comparisons between the African population and the East Asian population for allele 1 falling into the allele frequency bin between 0.25-0.30 in the African population; (b) comparisons between the African population and the European population for allele 1 falling into the allele frequency bin between 0.25-0.30 in the African population; (c) comparisons between the African population and the South Asian population for allele 1 falling into the allele frequency bin between 0.25-0.30 in the African population; (d) comparisons between the East Asian population and the African population for allele 1 falling into the allele frequency bin between 0.25-0.30 in the East Asian population; (e) comparisons between the East Asian population and the European population for allele 1 falling into the allele frequency bin between 0.25-0.30 in the East Asian population; (f) comparisons between the East Asian population and the South Asian population for allele 1 falling into the allele frequency bin between 0.25-0.30 in the East Asian population; (g) comparisons between the European population and the African population for allele 1 falling into the allele frequency bin between 0.25-0.30 in the European population; (h) comparisons between the European population and the East Asian population for allele 1 falling into the allele frequency bin between 0.25-0.30 in the European population; (i) comparisons between the European population and the South Asian population for allele 1 falling into the allele frequency bin between 0.25-0.30 in the European population; (j) comparisons between the South Asian population and the African population for allele 1 falling into the allele frequency bin between 0.25-0.30 in the South Asian population; (k) comparisons between the South Asian population and the East Asian population for allele 1 falling into the allele frequency bin between 0.25-0.30 in the South Asian population; (l) comparisons between the South Asian population and the European population for allele 1 falling into the allele frequency bin between 0.25-0.30 in the South Asian population.

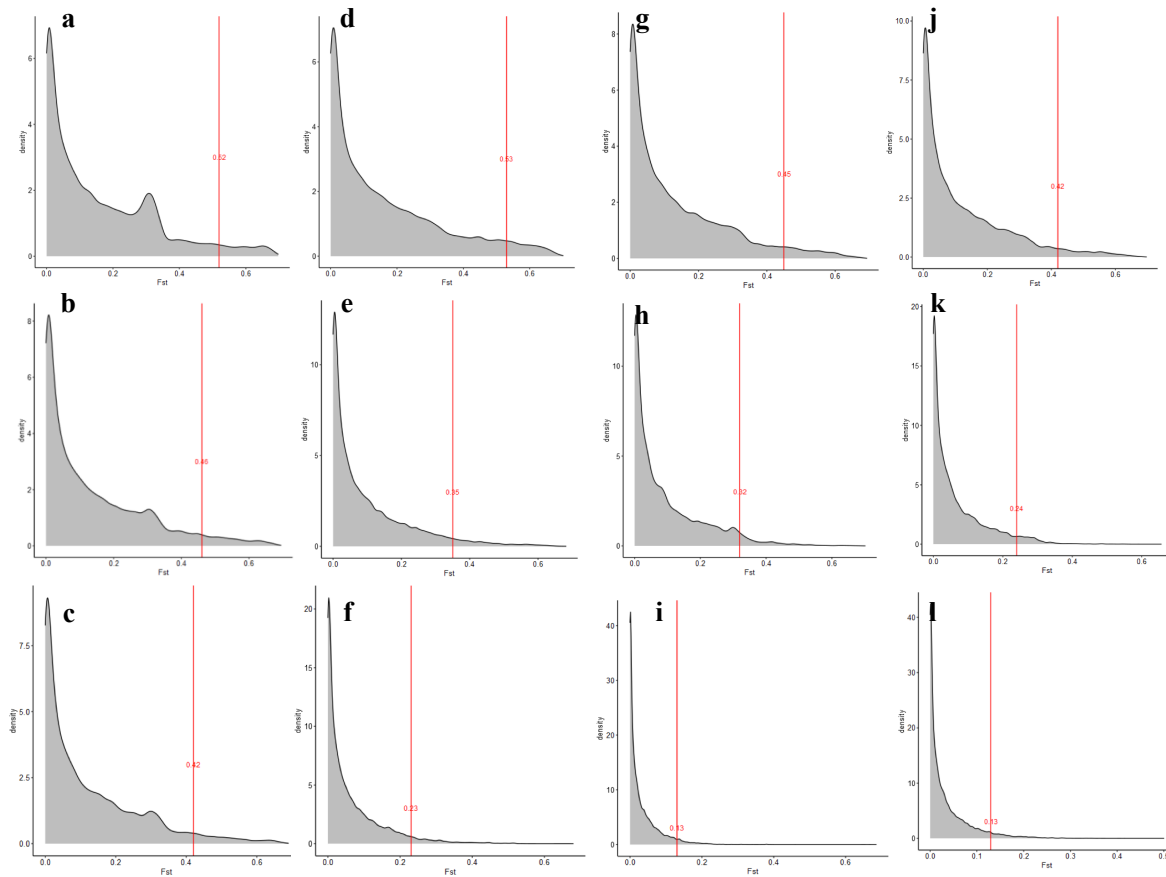

**Figure S6** Pairwise  $F_{ST}$  distributions. The top 5% thresholds were given. (a) comparisons between the African population and the East Asian population for allele 1 falling into the allele frequency bin between 0.30-0.35 in the African population; (b) comparisons between the African population and the European population for allele 1 falling into the allele frequency bin between 0.30-0.35 in the African population; (c) comparisons between the African population and the South Asian population for allele 1 falling into the allele frequency bin between 0.30-0.35 in the African population; (d) comparisons between the East Asian population and the African population for allele 1 falling into the allele frequency bin between 0.30-0.35 in the East Asian population; (e) comparisons between the East Asian population and the European population for allele 1 falling into the allele frequency bin between 0.30-0.35 in the East Asian population; (f) comparisons between the East Asian population and the South Asian population for allele 1 falling into the allele frequency bin between 0.30-0.35 in the East Asian population; (g) comparisons between the European population and the African population for allele 1 falling into the allele frequency bin between 0.30-0.35 in the European population; (h) comparisons between the European population and the East Asian population for allele 1 falling into the allele frequency bin between 0.30-0.35 in the European population; (i) comparisons between the European population and the South Asian population for allele 1 falling into the allele frequency bin between 0.30-0.35 in the European population; (j) comparisons between the South Asian population and the African population for allele 1 falling into the allele frequency bin between 0.30-0.35 in the South Asian population; (k) comparisons between the South Asian population and the East Asian population for allele 1 falling into the allele frequency bin between 0.30-0.35 in the South Asian population; (l) comparisons between the South Asian population and the European population for allele 1 falling into the allele frequency bin between 0.30-0.35 in the South Asian population.

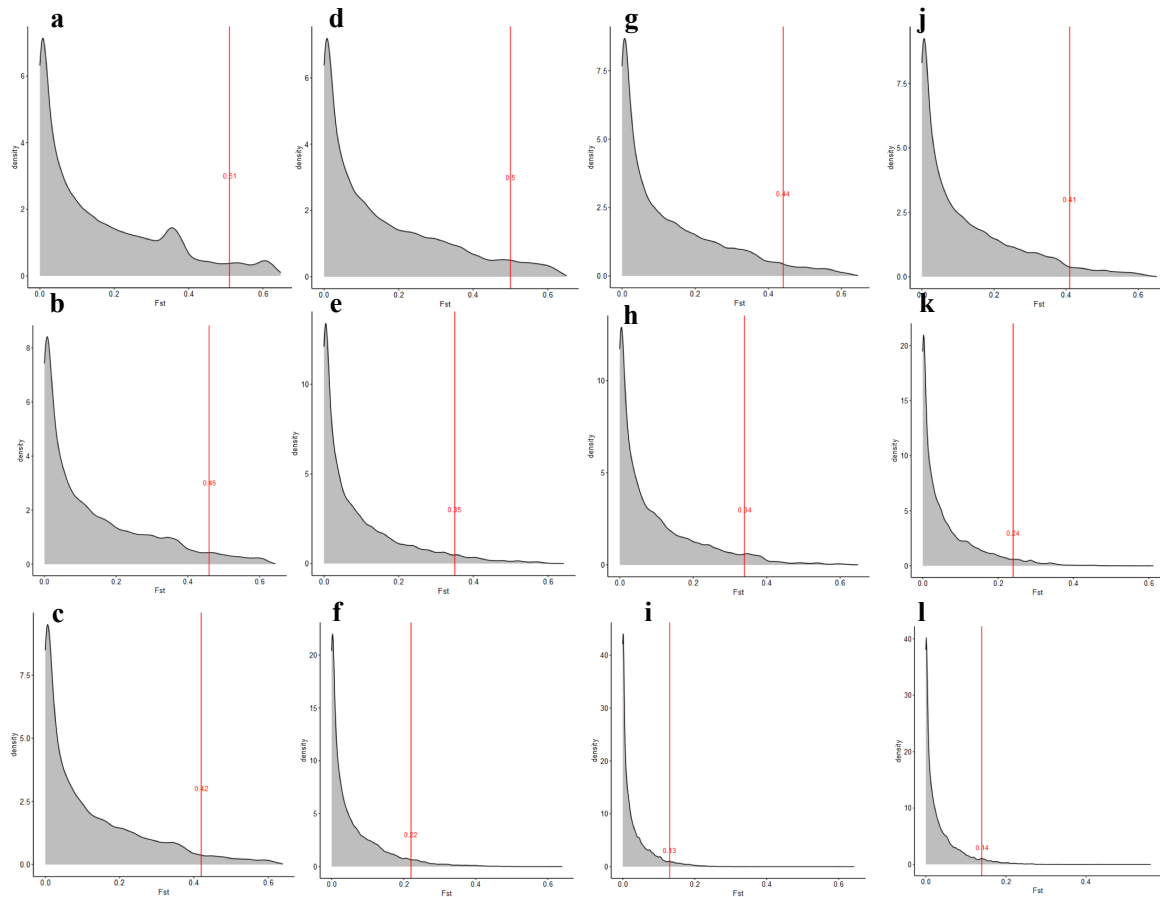

**Figure S7** Pairwise  $F_{ST}$  distributions. The top 5% thresholds were given. (a) comparisons between the African population and the East Asian population for allele 1 falling into the allele frequency bin between 0.35-0.40 in the African population; (b) comparisons between the African population and the European population for allele 1 falling into the allele frequency bin between 0.35-0.40 in the African population; (c) comparisons between the African population and the South Asian population for allele 1 falling into the allele frequency bin between 0.35-0.40 in the African population; (d) comparisons between the East Asian population and the African population for allele 1 falling into the allele frequency bin between 0.35-0.40 in the East Asian population; (e) comparisons between the East Asian population and the European population for allele 1 falling into the allele frequency bin between 0.35-0.40 in the East Asian population; (f) comparisons between the East Asian population and the South Asian population for allele 1 falling into the allele frequency bin between 0.35-0.40 in the East Asian population; (g) comparisons between the European population and the African population for allele 1 falling into the allele frequency bin between 0.35-0.40 in the European population; (h) comparisons between the European population and the East Asian population for allele 1 falling into the allele frequency bin between 0.35-0.40 in the European population; (i) comparisons between the European population and the South Asian population for allele 1 falling into the allele frequency bin between 0.35-0.40 in the European population; (j) comparisons between the South Asian population and the African population for allele 1 falling into the allele frequency bin between 0.35-0.40 in the South Asian population; (k) comparisons between the South Asian population and the East Asian population for allele 1 falling into the allele frequency bin between 0.35-0.40 in the South Asian population; (l) comparisons between the South Asian population and the European population for allele 1 falling into the allele frequency bin between 0.35-0.40 in the South Asian population.

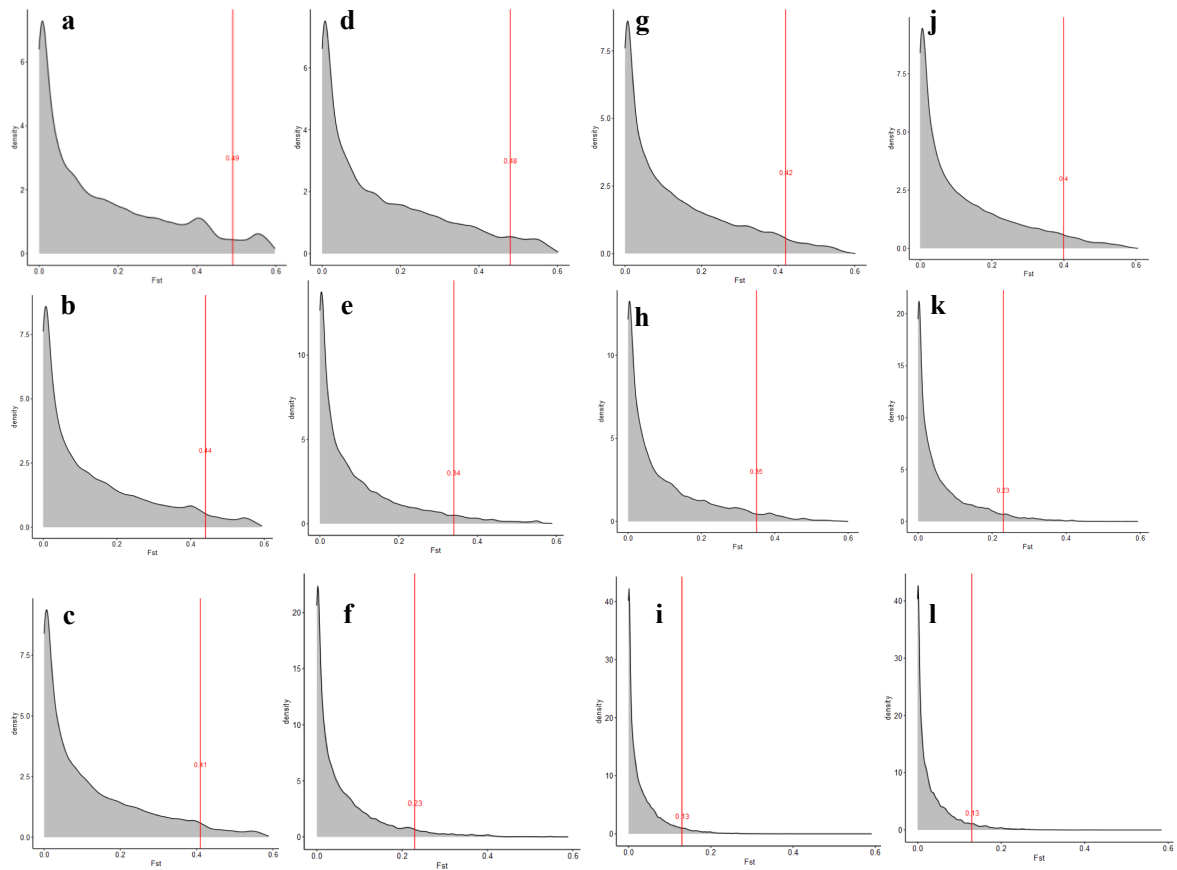

**Figure S8** Pairwise  $F_{ST}$  distributions. The top 5% thresholds were given. (a) comparisons between the African population and the East Asian population for allele 1 falling into the allele frequency bin between 0.40-0.45 in the African population; (b) comparisons between the African population and the European population for allele 1 falling into the allele frequency bin between 0.40-0.45 in the African population; (c) comparisons between the African population and the South Asian population for allele 1 falling into the allele frequency bin between 0.40-0.45 in the African population; (d) comparisons between the East Asian population and the African population for allele 1 falling into the allele frequency bin between 0.40-0.45 in the East Asian population; (e) comparisons between the East Asian population and the European population for allele 1 falling into the allele frequency bin between 0.40-0.45 in the East Asian population; (f) comparisons between the East Asian population and the South Asian population for allele 1 falling into the allele frequency bin between 0.40-0.45 in the East Asian population; (g) comparisons between the European population and the African population for allele 1 falling into the allele frequency bin between 0.40-0.45 in the European population; (h) comparisons between the European population and the East Asian population for allele 1 falling into the allele frequency bin between 0.40-0.45 in the European population; (i) comparisons between the European population and the South Asian population for allele 1 falling into the allele frequency bin between 0.40-0.45 in the European population; (j) comparisons between the South Asian population and the African population for allele 1 falling into the allele frequency bin between 0.40-0.45 in the South Asian population; (k) comparisons between the South Asian population and the East Asian population for allele 1 falling into the allele frequency bin between 0.40-0.45 in the South Asian population; (l) comparisons between the South Asian population and the European population for allele 1 falling into the allele frequency bin between 0.40-0.45 in the South Asian population.

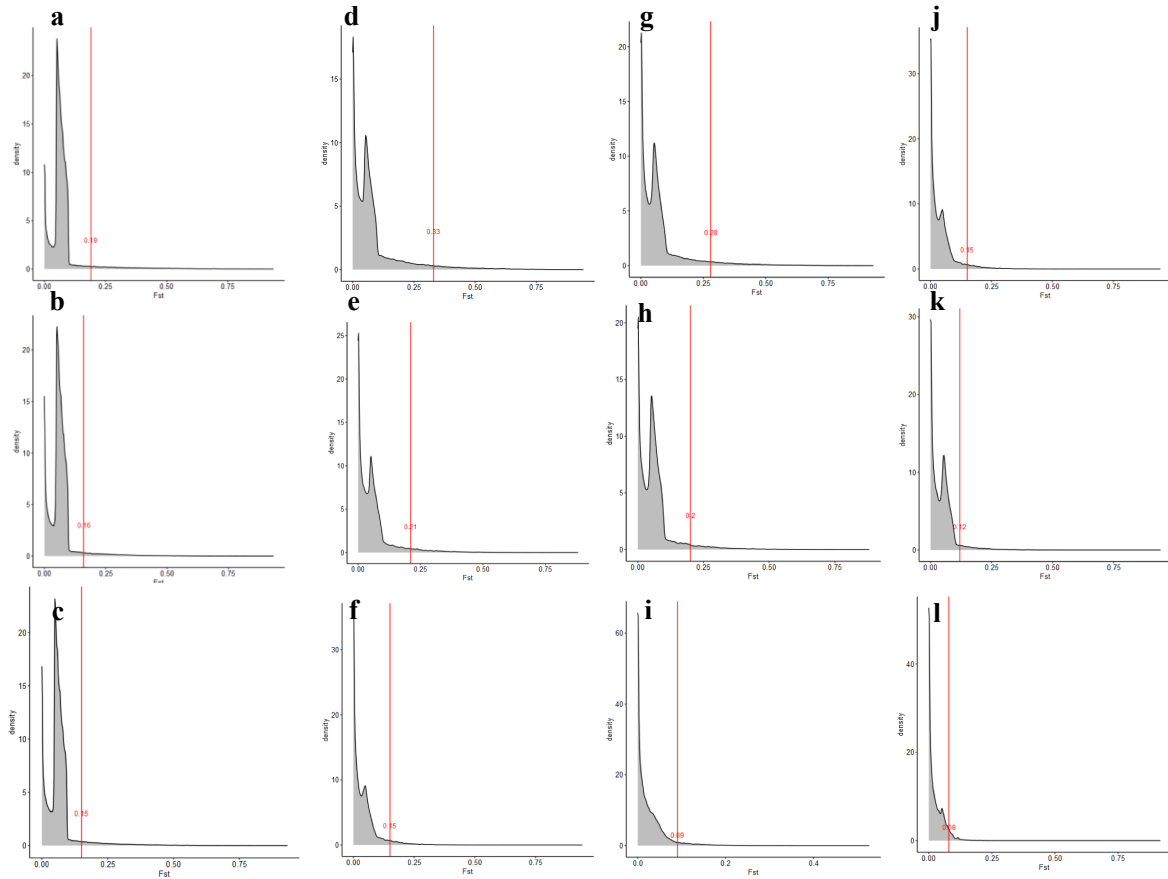

**Figure S9** Pairwise  $F_{ST}$  distributions. The top 5% thresholds were given. (a) comparisons between the African population and the East Asian population for allele 2 falling into the allele frequency bin between 0.05-0.10 in the African population; (b) comparisons between the African population and the European population for allele 2 falling into the allele frequency bin between 0.05-0.10 in the African population; (c) comparisons between the African population and the South Asian population for allele 2 falling into the allele frequency bin between 0.05-0.10 in the African population; (d) comparisons between the East Asian population and the African population for allele 2 falling into the allele frequency bin between 0.05-0.10 in the East Asian population; (e) comparisons between the East Asian population and the European population for allele 2 falling into the allele frequency bin between 0.05-0.10 in the East Asian population; (f) comparisons between the East Asian population and the South Asian population for allele 2 falling into the allele frequency bin between 0.05-0.10 in the East Asian population; (g) comparisons between the European population and the African population for allele 2 falling into the allele frequency bin between 0.05-0.10 in the European population; (h) comparisons between the European population and the East Asian population for allele 2 falling into the allele frequency bin between 0.05-0.10 in the European population; (i) comparisons between the European population and the South Asian population for allele 2 falling into the allele frequency bin between 0.05-0.10 in the European population; (j) comparisons between the South Asian population and the African population for allele 2 falling into the allele frequency bin between 0.05-0.10 in the South Asian population; (k) comparisons between the South Asian population and the East Asian population for allele 2 falling into the allele frequency bin between 0.05-0.10 in the South Asian population; (l) comparisons between the South Asian population and the European population for allele 2 falling into the allele frequency bin between 0.05-0.10 in the South Asian population.

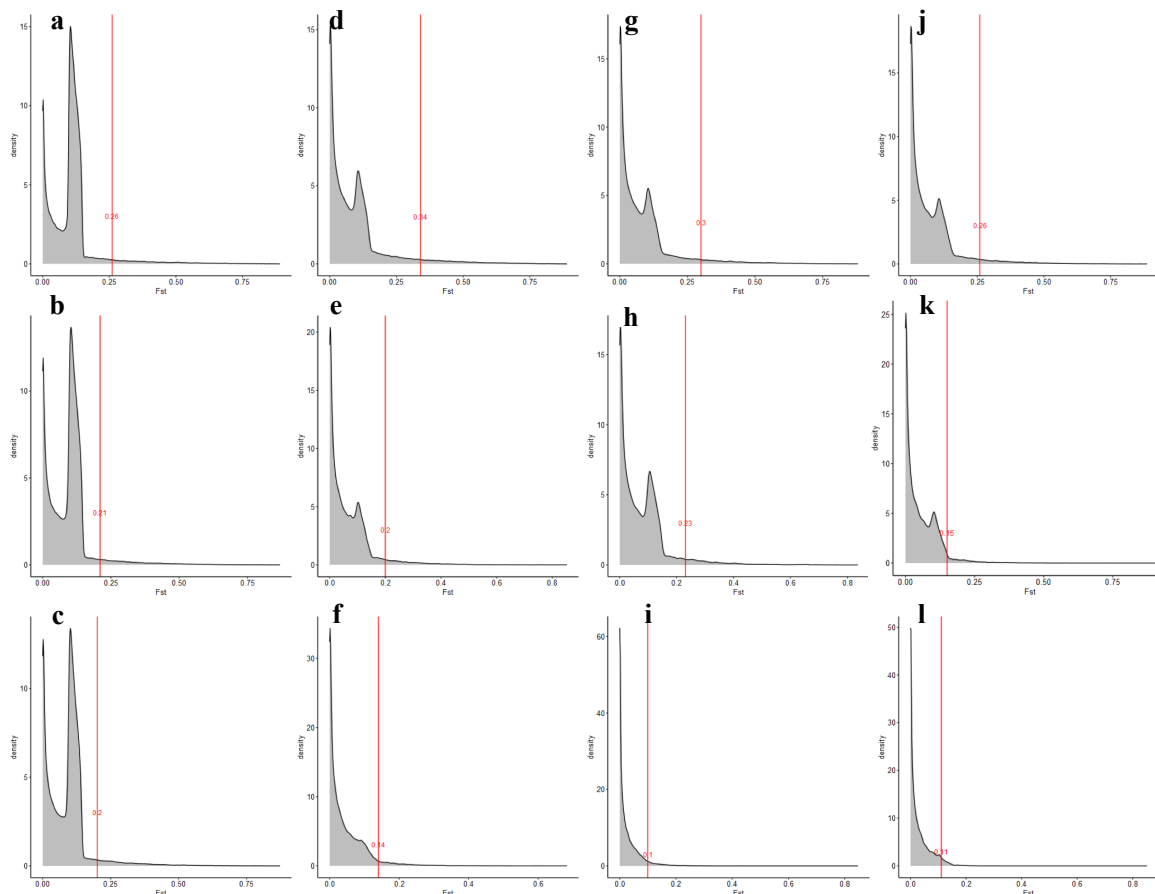

**Figure S10** Pairwise  $F_{ST}$  distributions. The top 5% thresholds were given. (a) comparisons between the African population and the East Asian population for allele 2 falling into the allele frequency bin between 0.10-0.15 in the African population; (b) comparisons between the African population and the European population for allele 2 falling into the allele frequency bin between 0.10-0.15 in the African population; (c) comparisons between the African population and the South Asian population for allele 2 falling into the allele frequency bin between 0.10-0.15 in the African population; (d) comparisons between the East Asian population and the African population for allele 2 falling into the allele frequency bin between 0.10-0.15 in the East Asian population; (e) comparisons between the East Asian population and the European population for allele 2 falling into the allele frequency bin between 0.10-0.15 in the East Asian population; (f) comparisons between the East Asian population and the South Asian population for allele 2 falling into the allele frequency bin between 0.10-0.15 in the East Asian population; (g) comparisons between the European population and the African population for allele 2 falling into the allele frequency bin between 0.10-0.15 in the European population; (h) comparisons between the European population and the East Asian population for allele 2 falling into the allele frequency bin between 0.10-0.15 in the European population; (i) comparisons between the European population and the South Asian population for allele 2 falling into the allele frequency bin between 0.10-0.15 in the European population; (j) comparisons between the South Asian population and the African population for allele 2 falling into the allele frequency bin between 0.10-0.15 in the South Asian population; (k) comparisons between the South Asian population and the East Asian population for allele 2 falling into the allele frequency bin between 0.10-0.15 in the South Asian population; (l) comparisons between the South Asian population and the European population for allele 2 falling into the allele frequency bin between 0.10-0.15 in the South Asian population.

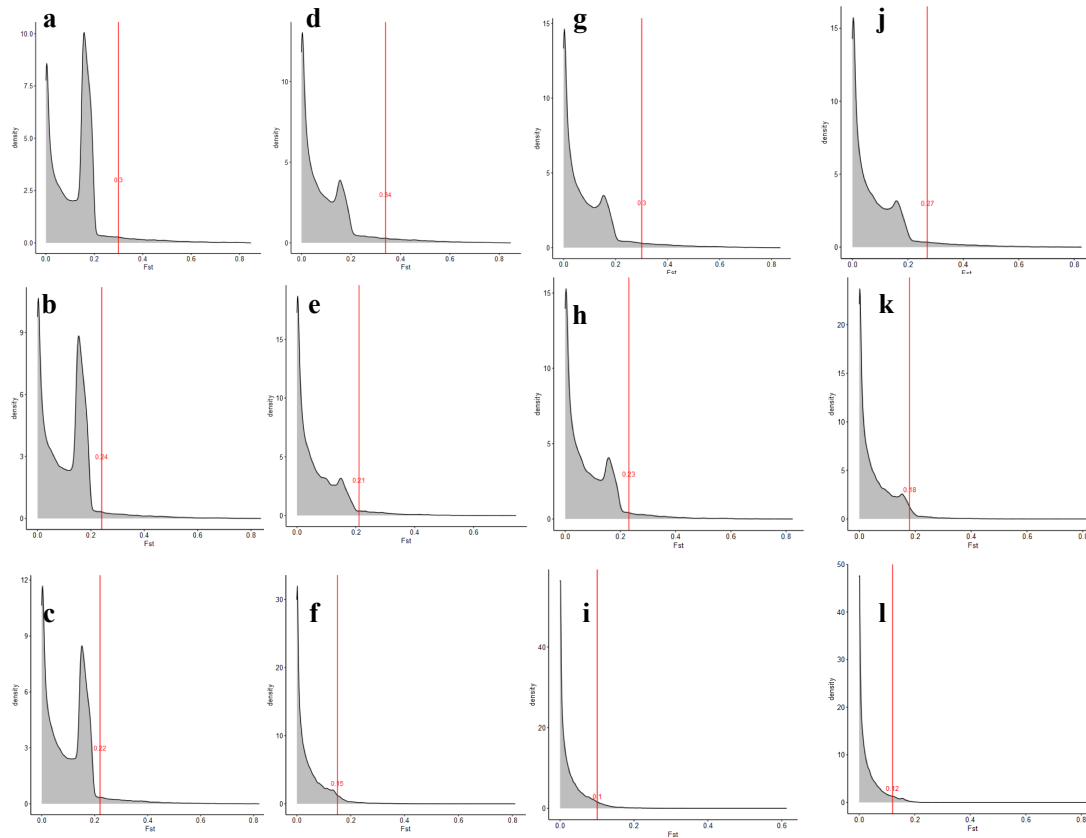

**Figure S11** Pairwise  $F_{ST}$  distributions. The top 5% thresholds were given. (a) comparisons between the African population and the East Asian population for allele 2 falling into the allele frequency bin between 0.15-0.20 in the African population; (b) comparisons between the African population and the European population for allele 2 falling into the allele frequency bin between 0.15-0.20 in the African population; (c) comparisons between the African population and the South Asian population for allele 2 falling into the allele frequency bin between 0.15-0.20 in the African population; (d) comparisons between the East Asian population and the African population for allele 2 falling into the allele frequency bin between 0.15-0.20 in the East Asian population; (e) comparisons between the East Asian population and the European population for allele 2 falling into the allele frequency bin between 0.15-0.20 in the East Asian population; (f) comparisons between the East Asian population and the South Asian population for allele 2 falling into the allele frequency bin between 0.15-0.20 in the East Asian population; (g) comparisons between the European population and the African population for allele 2 falling into the allele frequency bin between 0.15-0.20 in the European population; (h) comparisons between the European population and the East Asian population for allele 2 falling into the allele frequency bin between 0.15-0.20 in the European population; (i) comparisons between the European population and the South Asian population for allele 2 falling into the allele frequency bin between 0.15-0.20 in the European population; (j) comparisons between the South Asian population and the African population for allele 2 falling into the allele frequency bin between 0.15-0.20 in the South Asian population; (k) comparisons between the South Asian population and the East Asian population for allele 2 falling into the allele frequency bin between 0.15-0.20 in the South Asian population; (l) comparisons between the South Asian population and the European population for allele 2 falling into the allele frequency bin between 0.15-0.20 in the South Asian population.

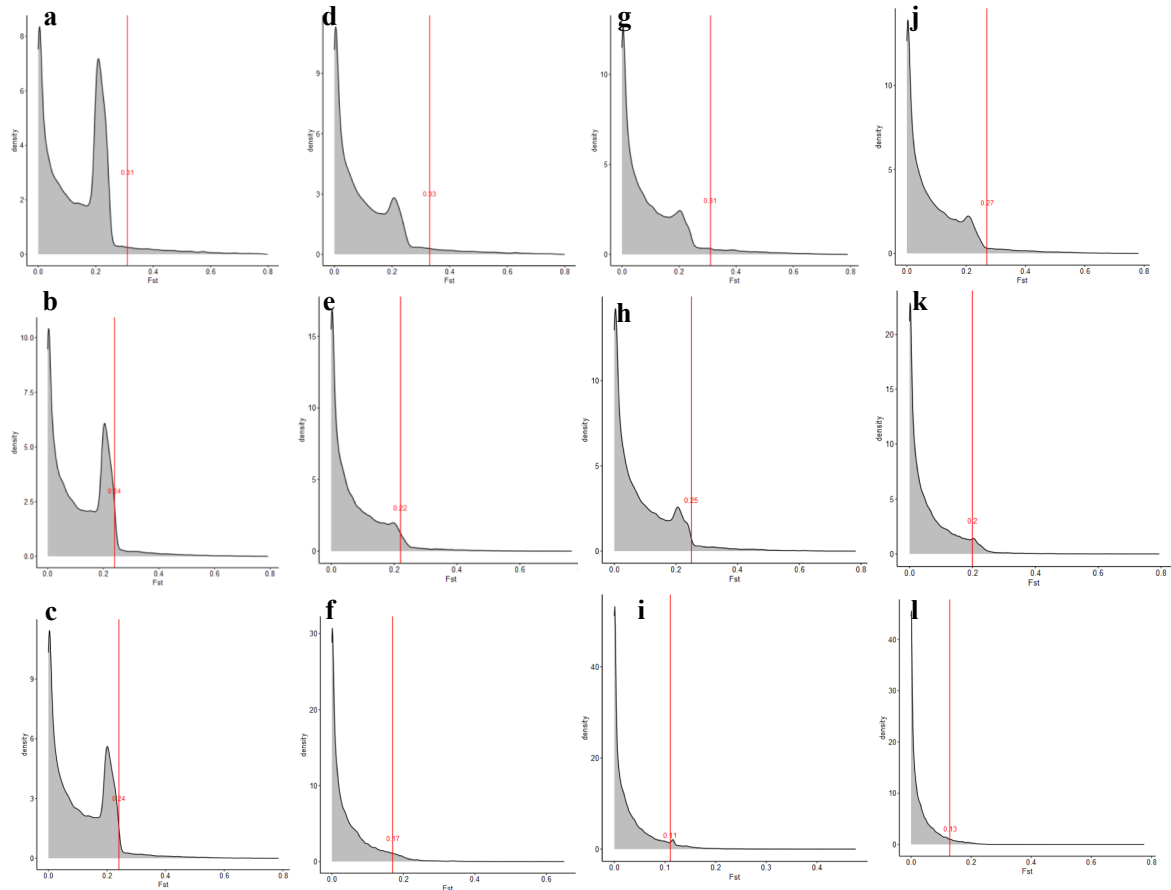

**Figure S12** Pairwise  $F_{ST}$  distributions. The top 5% thresholds were given. (a) comparisons between the African population and the East Asian population for allele 2 falling into the allele frequency bin between 0.20-0.25 in the African population; (b) comparisons between the African population and the European population for allele 2 falling into the allele frequency bin between 0.20-0.25 in the African population; (c) comparisons between the African population and the South Asian population for allele 2 falling into the allele frequency bin between 0.20-0.25 in the African population; (d) comparisons between the East Asian population and the African population for allele 2 falling into the allele frequency bin between 0.20-0.25 in the East Asian population; (e) comparisons between the East Asian population and the European population for allele 2 falling into the allele frequency bin between 0.20-0.25 in the East Asian population; (f) comparisons between the East Asian population and the South Asian population for allele 2 falling into the allele frequency bin between 0.20-0.25 in the East Asian population; (g) comparisons between the European population and the African population for allele 2 falling into the allele frequency bin between 0.20-0.25 in the European population; (h) comparisons between the European population and the East Asian population for allele 2 falling into the allele frequency bin between 0.20-0.25 in the European population; (i) comparisons between the European population and the South Asian population for allele 2 falling into the allele frequency bin between 0.20-0.25 in the European population; (j) comparisons between the South Asian population and the African population for allele 2 falling into the allele frequency bin between 0.20-0.25 in the South Asian population; (k) comparisons between the South Asian population and the East Asian population for allele 2 falling into the allele frequency bin between 0.20-0.25 in the South Asian population; (l) comparisons between the South Asian population and the European population for allele 2 falling into the allele frequency bin between 0.20-0.25 in the South Asian population.

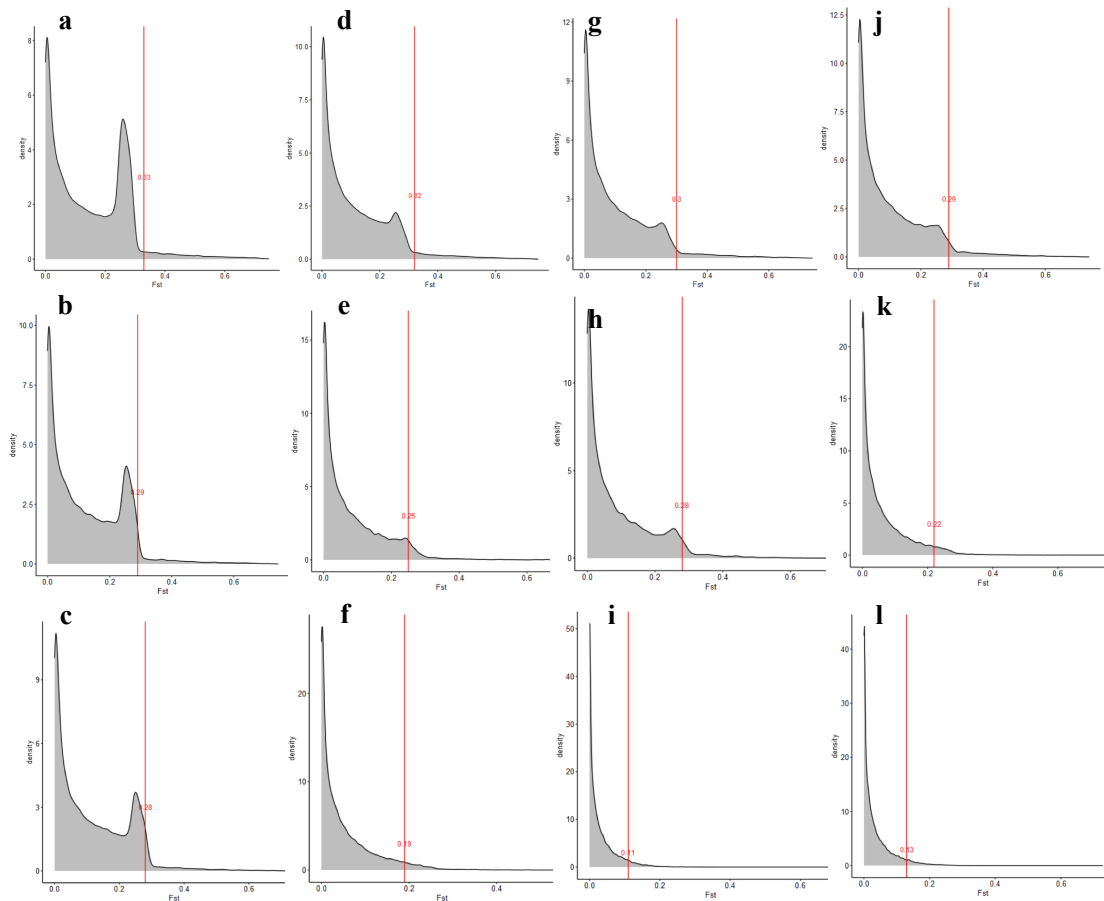

**Figure S13** Pairwise  $F_{ST}$  distributions. The top 5% thresholds were given. (a) comparisons between the African population and the East Asian population for allele 2 falling into the allele frequency bin between 0.25-0.30 in the African population; (b) comparisons between the African population and the European population for allele 2 falling into the allele frequency bin between 0.25-0.30 in the African population; (c) comparisons between the African population and the South Asian population for allele 2 falling into the allele frequency bin between 0.25-0.30 in the African population; (d) comparisons between the East Asian population and the African population for allele 2 falling into the allele frequency bin between 0.25-0.30 in the East Asian population; (e) comparisons between the East Asian population and the European population for allele 2 falling into the allele frequency bin between 0.25-0.30 in the East Asian population; (f) comparisons between the East Asian population and the South Asian population for allele 2 falling into the allele frequency bin between 0.25-0.30 in the East Asian population; (g) comparisons between the European population and the African population for allele 2 falling into the allele frequency bin between 0.25-0.30 in the European population; (h) comparisons between the European population and the East Asian population for allele 2 falling into the allele frequency bin between 0.25-0.30 in the European population; (i) comparisons between the European population and the South Asian population for allele 2 falling into the allele frequency bin between 0.25-0.30 in the European population; (j) comparisons between the South Asian population and the African population for allele 2 falling into the allele frequency bin between 0.25-0.30 in the South Asian population; (k) comparisons between the South Asian population and the East Asian population for allele 2 falling into the allele frequency bin between 0.25-0.30 in the South Asian population; (l) comparisons between the South Asian population and the European population for allele 2 falling into the allele frequency bin between 0.25-0.30 in the South Asian population.

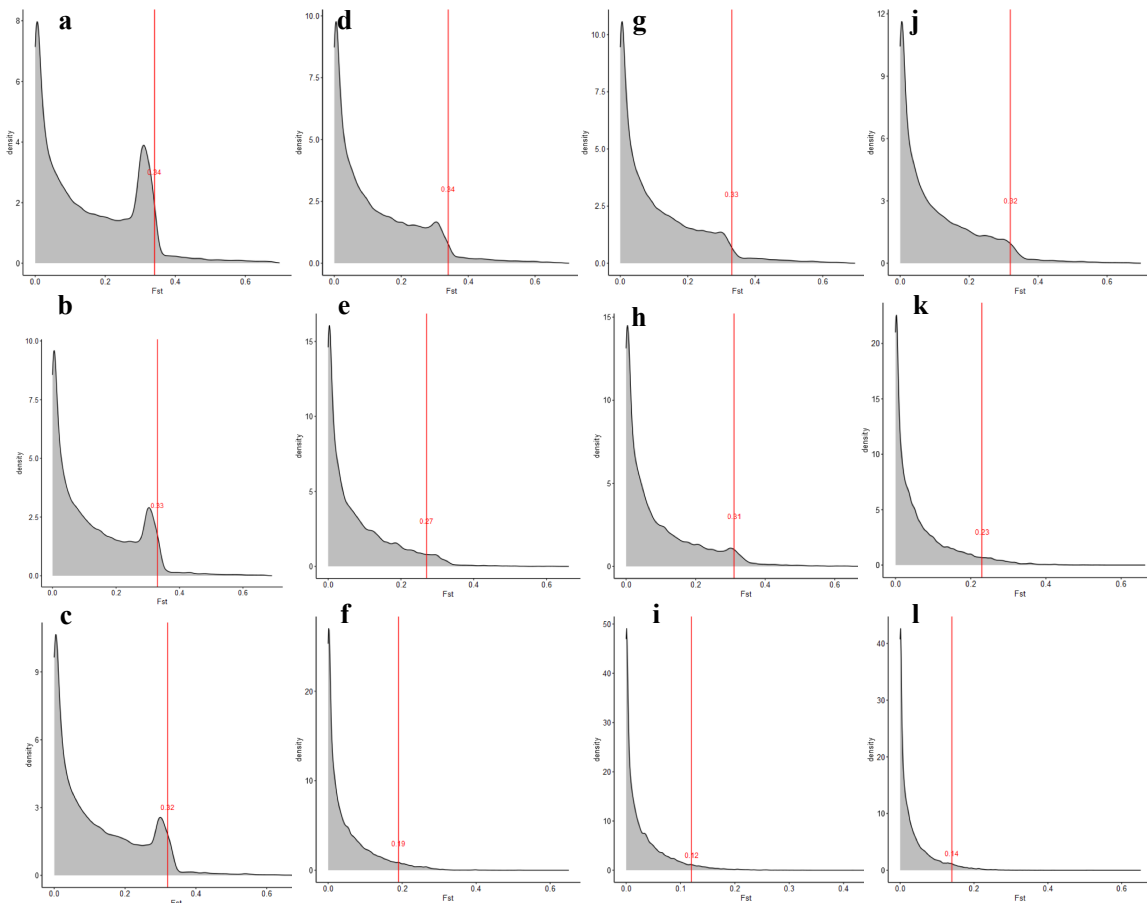

**Figure S14** Pairwise  $F_{ST}$  distributions. The top 5% thresholds were given. (a) comparisons between the African population and the East Asian population for allele 2 falling into the allele frequency bin between 0.30-0.35 in the African population; (b) comparisons between the African population and the European population for allele 2 falling into the allele frequency bin between 0.30-0.35 in the African population; (c) comparisons between the African population and the South Asian population for allele 2 falling into the allele frequency bin between 0.30-0.35 in the African population; (d) comparisons between the East Asian population and the African population for allele 2 falling into the allele frequency bin between 0.30-0.35 in the East Asian population; (e) comparisons between the East Asian population and the European population for allele 2 falling into the allele frequency bin between 0.30-0.35 in the East Asian population; (f) comparisons between the East Asian population and the South Asian population for allele 2 falling into the allele frequency bin between 0.30-0.35 in the East Asian population; (g) comparisons between the European population and the African population for allele 2 falling into the allele frequency bin between 0.30-0.35 in the European population; (h) comparisons between the European population and the East Asian population for allele 2 falling into the allele frequency bin between 0.30-0.35 in the European population; (i) comparisons between the European population and the South Asian population for allele 2 falling into the allele frequency bin between 0.30-0.35 in the European population; (j) comparisons between the South Asian population and the African population for allele 2 falling into the allele frequency bin between 0.30-0.35 in the South Asian population; (k) comparisons between the South Asian population and the East Asian population for allele 2 falling into the allele frequency bin between 0.30-0.35 in the South Asian population; (l) comparisons between the South Asian population and the European population for allele 2 falling into the allele frequency bin between 0.30-0.35 in the South Asian population.

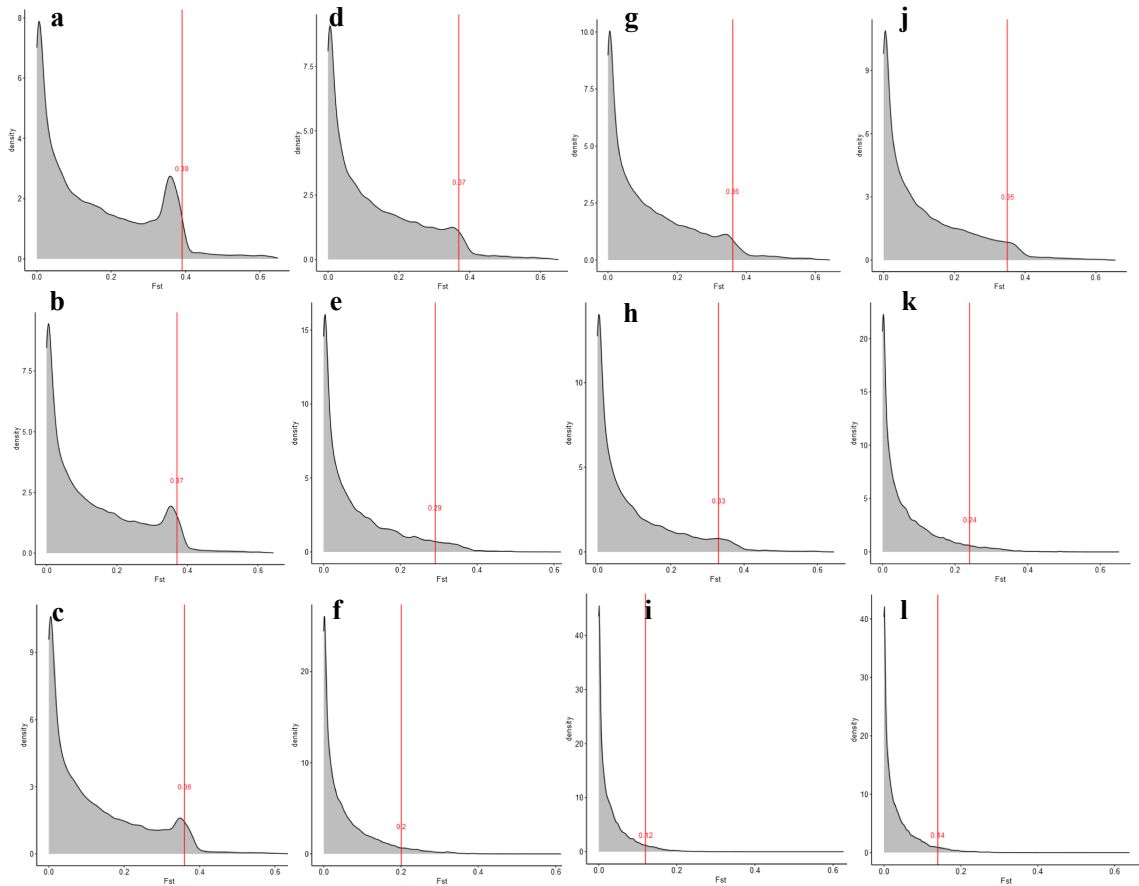

**Figure S15** Pairwise  $F_{ST}$  distributions. The top 5% thresholds were given. (a) comparisons between the African population and the East Asian population for allele 2 falling into the allele frequency bin between 0.35-0.40 in the African population; (b) comparisons between the African population and the European population for allele 2 falling into the allele frequency bin between 0.35-0.40 in the African population; (c) comparisons between the African population and the South Asian population for allele 2 falling into the allele frequency bin between 0.35-0.40 in the African population; (d) comparisons between the East Asian population and the African population for allele 2 falling into the allele frequency bin between 0.35-0.40 in the East Asian population; (e) comparisons between the East Asian population and the European population for allele 2 falling into the allele frequency bin between 0.35-0.40 in the East Asian population; (f) comparisons between the East Asian population and the South Asian population for allele 2 falling into the allele frequency bin between 0.35-0.40 in the East Asian population; (g) comparisons between the European population and the African population for allele 2 falling into the allele frequency bin between 0.35-0.40 in the European population; (h) comparisons between the European population and the East Asian population for allele 2 falling into the allele frequency bin between 0.35-0.40 in the European population; (i) comparisons between the European population and the South Asian population for allele 2 falling into the allele frequency bin between 0.35-0.40 in the European population; (j) comparisons between the South Asian population and the African population for allele 2 falling into the allele frequency bin between 0.35-0.40 in the South Asian population; (k) comparisons between the South Asian population and the East Asian population for allele 2 falling into the allele frequency bin between 0.35-0.40 in the South Asian population; (l) comparisons between the South Asian population and the European population for allele 2 falling into the allele frequency bin between 0.35-0.40 in the South Asian population.

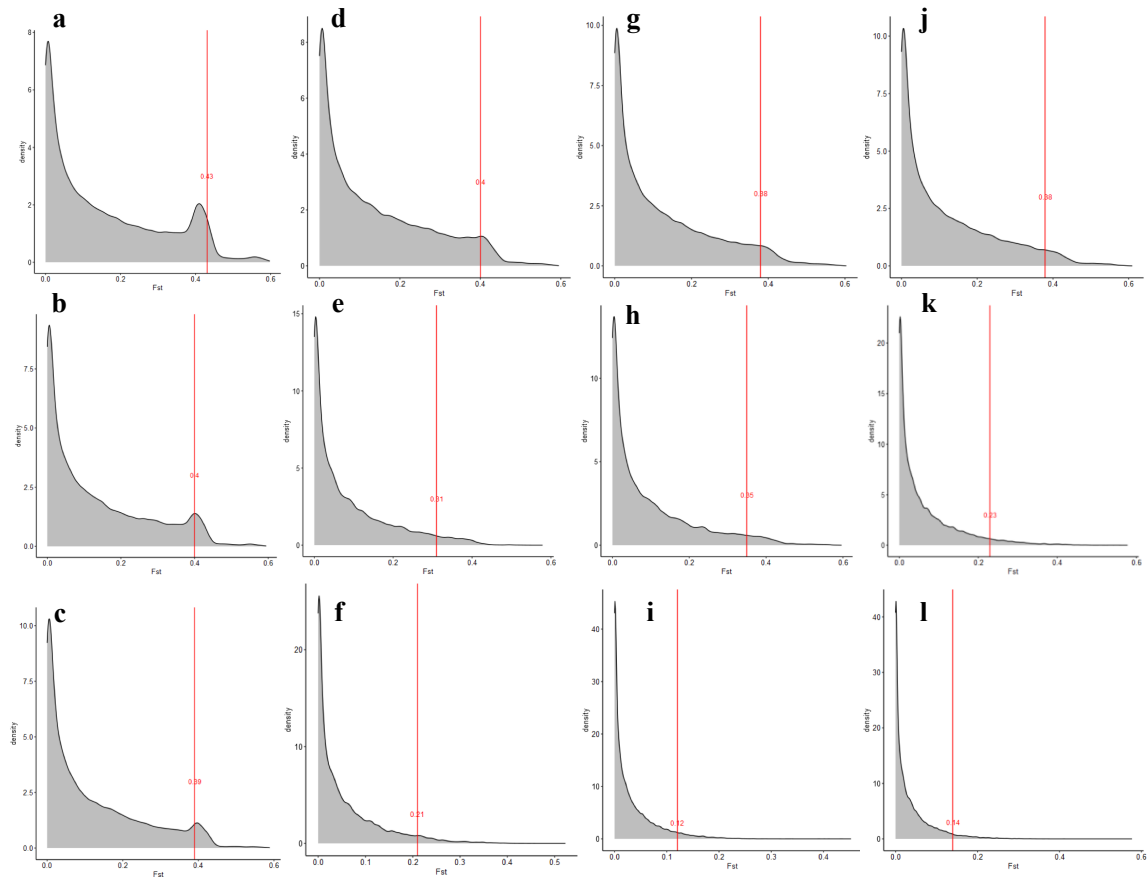

**Figure S16** Pairwise  $F_{ST}$  distributions. The top 5% thresholds were given. (a) comparisons between the African population and the East Asian population for allele 2 falling into the allele frequency bin between 0.40-0.45 in the African population; (b) comparisons between the African population and the European population for allele 2 falling into the allele frequency bin between 0.40-0.45 in the African population; (c) comparisons between the African population and the South Asian population for allele 2 falling into the allele frequency bin between 0.40-0.45 in the African population; (d) comparisons between the East Asian population and the African population for allele 2 falling into the allele frequency bin between 0.40-0.45 in the East Asian population; (e) comparisons between the East Asian population and the European population for allele 2 falling into the allele frequency bin between 0.40-0.45 in the East Asian population; (f) comparisons between the East Asian population and the South Asian population for allele 2 falling into the allele frequency bin between 0.40-0.45 in the East Asian population; (g) comparisons between the European population and the African population for allele 2 falling into the allele frequency bin between 0.40-0.45 in the European population; (h) comparisons between the European population and the East Asian population for allele 2 falling into the allele frequency bin between 0.40-0.45 in the European population; (i) comparisons between the European population and the South Asian population for allele 2 falling into the allele frequency bin between 0.40-0.45 in the European population; (j) comparisons between the South Asian population and the African population for allele 2 falling into the allele frequency bin between 0.40-0.45 in the South Asian population; (k) comparisons between the South Asian population and the East Asian population for allele 2 falling into the allele frequency bin between 0.40-0.45 in the South Asian population; (l) comparisons between the South Asian population and the European population for allele 2 falling into the allele frequency bin between 0.40-0.45 in the South Asian population.
