# Supplementary material for: The adaptive evolution of cancer driver genes
Source: Springer Nature journal article supplement (doi:10.1186/s12864-023-09301-9), 2023-04-25
Supplement: MOESM3 [file 12864_2023_9301_MOESM3_ESM.pdf]

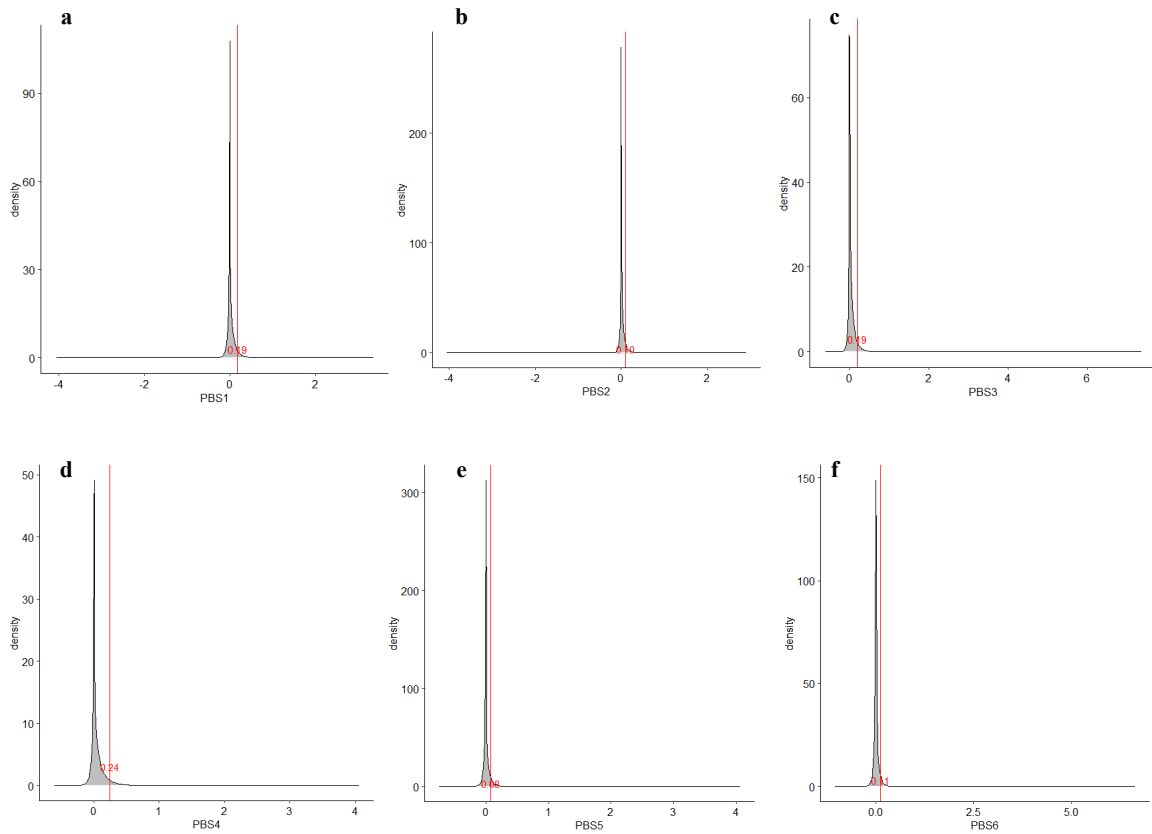

**Figure S1** PBS distributions of various comparisons between populations, with the African population as the outgroup. (a) PBS1, divergence of the European population from the East Asian population; (b) PBS2, divergence of the European population from the South Asian population; (c) PBS3, divergence of the East Asian population from the South Asian population; (d) PBS4, divergence of the East Asian population from the European population; (e) PBS5, divergence of the South Asian population from the European population; (f) PBS6, divergence of the South Asian population from the East Asian population. Top 5% values were set as the thresholds.
