# Supplementary material for: The adaptive evolution of cancer driver genes
Source: BMC Genomics. 2023 Apr 25;24:215. doi: 10.1186/s12864-023-09301-9 (PMC10131384; doi:10.1186/s12864-023-09301-9)
Supplement: Supplementary file 4 — Additional file 4. [file 12864_2023_9301_MOESM4_ESM.xlsx]

## Sheet: Sheet1
gene	function (immune/neuro-related)	literature
FOXD4L1	neuroectoderm	Moody et al., 2013;Yan et al., 2010
CUX1	neural disease	Sasayama et al., 2013
U2AF1	/	/
FOXA2	immune	Tang et al., 2013; Chen et al., 2010
HERC2	neurodevelopment,skin pigmentation	Vincent et al., 2021;
SH2B3	immune	Zhernakova et al., 2010
ACVR1	neurodevelopment	Yu et al., 2023
RANBP2	brain disease	Kelly et al., 2019
LATS1	brain disease	Geng et al., 2022;Oh et al., 2015
FN1	immune	Zhang et al., 2022;Geng et al., 2022
ERCC2	/	/
BCL2	immune	Singh et al., 2021
KIFC1	immune	Li et al., 2022
MAP2	brain disease,neuro development	Grubisha et al., 2021;DeGiosio et al., 2022
NTRK1	immune; neuro disease	Pajtler et al., 2013;Nam et al., 2017
FAT3	/	/
CHD2	neuro disease	Wilson et al., 2021; Neuron et al., 2018
RGPD3	/	/
DIS3	/	/
TSC2	neuro disease	Northrup et al., 1999; Hasbani et al., 2018
PARP4	brain disease	Mata et al., 2017
ZNF780A	/	/
CIITA	neuro development, immune	Williams et al., 2018; Toloza et al., 2022
ZNF814	/	/
FAT1	/	/
HOXC13	/	/
SOX17	immune	Ha et al., 2019
WT1	brain disease; immune	Wang et al., 2020; Jiang et al., 2021
PSIP1	/	/
MYO5A	/	/
NOTCH1	immune, neurodevelopment	Chatila et al., 2022;Cho et al., 2019
MARK2	neurodevelopment	DiBona et al., 2019
DNAJB1	/	/
AXIN1	immune, neurodevelopment	Neufeld et al., 2022;Guo et al., 2022;Fang et al., 2022
DICER1	immune	Herbert et al., 2019;De Cauwer et al., 2018
