# Supplementary material for: The adaptive evolution of cancer driver genes
Source: BMC Genomics. 2023 Apr 25;24:215. doi: 10.1186/s12864-023-09301-9 (PMC10131384; doi:10.1186/s12864-023-09301-9)
Supplement: Supplementary file 7 — Additional file 7. [file 12864_2023_9301_MOESM7_ESM.xlsx]

## Sheet: Sheet1
Positive selection detection using iHS within the African population and Fst comparisons between populations
ID	sites_with absolute iHS>2		gene name	Fst comparisons			Africa		East Asia		Europe		South Asia		PBS		cancer types
	chromosome	SNP		Africa vs. East Asia	Africa vs. Europe	Africa vs.South Asia	allele 1	allele 2	allele 1	allele 2	allele 1	allele 2	allele 1	allele 2
ENST00000306507	2	114257443	FOXD4L1	0.33	0.01	0.04	0.91	0.09	0.51	0.49	0.86	0.14	0.82	0.18	/		MM
ENST00000306507	2	114256759	FOXD4L1	0.32	0.03	0.09	0.83	0.17	0.41	0.59	0.72	0.28	0.64	0.36	/		MM
Positive selection detection using iHS within the East Asian population and Fst comparisons between populations
ID	sites_with absolute iHS>2		gene name	comparisons			Africa		East Asia		Europe		South Asia		PBS		cancer types
	chromosome	SNP		Africa vs. East Asia	East Asia vs. Europe	East Asia vs. South Asia	allele 1	allele 2	allele 1	allele 2	allele 1	allele 2	allele 1	allele 2	East Asia to Europe	East Asia to South Asia
ENST00000360264	7	101837149	CUX1	0.24	0.28	0.22	0.62	0.38	0.92	0.08	0.61	0.39	0.64	0.36	0.27*	0.26*	BRCA,CM,GBM,LUAD,NSCLC,THCA,UCEC
ENST00000360264	7	101844851	CUX1	0.28	0.22	0.2	0.55	0.45	0.92	0.08	0.61	0.39	0.63	0.37	0.29*	0.28*	BRCA,CM,GBM,LUAD,NSCLC,THCA,UCEC
ENST00000291552	21	44527669	U2AF1	0.35	0.18	0.13	0.47	0.53	0.9	0.1	0.63	0.37	0.69	0.31	0.29*	0.24*	AML,LUAD,NSCLC,PAAD,PRAD,UCEC,UCS
ENST00000419308	20	22562438	FOXA2	0.46	0.04	0.02	0.28	0.72	0.82	0.18	0.92	0.08	0.89	0.11	/	/	UCEC
Positive selection detection using iHS within the European population and Fst comparisons between populations
ID	sites_with absolute iHS>2		gene name	Fst comparisons			Africa		East Asia		Europe		South Asia		PBS		cancer types
	chromosome	SNP		Africa vs. Europe	East Asia vs. Europe	Europe vs. South Asia	allele 1	allele 2	allele 1	allele 2	allele 1	allele 2	allele 1	allele 2	Europe to East Asia	Europe to South Asia
ENST00000261609	15	28467246	HERC2	0.54	0.45	0.27	0.9	0.1	0.84	0.16	0.23	0.77	0.72	0.28	0.88*	0.68*	THCA
ENST00000261609	15	28502279	HERC2	0.46	0.37	0	0.8	0.2	0.74	0.26	0.18	0.82	0.56	0.44	0.72*	0.49*	THCA
ENST00000306507	2	114257443	FOXD4L1	0.33	0.01	0.04	0.91	0.09	0.51	0.49	0.86	0.14	0.82	0.18	/	/	MM
ENST00000306507	2	114256978	FOXD4L1	0.12	0.25	0.04	0.67	0.33	0.53	0.47	0.88	0.12	0.77	0.23	0.19*	/	MM
ENST00000341259	12	111887659	SH2B3	0.07	0.64	0.06	0.62	0.38	0.12	0.88	0.8	0.2	0.64	0.36	0.26*	/	MDPS
Positive selection detection using iHS within the South Asian population and Fst comparisons between populations
ID	sites_with absolute iHS>2		gene name	Fst comparisons			Africa		East Asia		Europe		South Asia		PBS		cancer types
	chromosome	SNP		Africa vs South Asia	East Asia vs South Asia	Europe vs South Asia	allele 1	allele 2	allele 1	allele 2	allele 1	allele 2	allele 1	allele 2
ENST00000419308	20	22562438	FOXA2	0.56	0	0	0.28	0.72	0.82	0.18	0.92	0.08	0.89	0.11	/		UCEC
ENST00000419308	20	22563025	FOXA2	0.37	0.02	0.01	0.44	0.56	0.82	0.18	0.93	0.07	0.89	0.11	/		UCEC
ENST00000306507	2	114257443	FOXD4L1	0.33	0.01	0.04	0.91	0.09	0.51	0.49	0.86	0.14	0.82	0.18	/		MM
ENST00000263640	2	158636910	ACVR1	0.53	0.05	0	0.82	0.18	0.1	0.9	0.21	0.79	0.21	0.79	/		HGG,UCEC
ENST00000263640	2	158593357	ACVR1	0.74	0	0	0.05	0.95	0.74	0.26	0.73	0.27	0.81	0.19	/		HGG,UCEC
Positive selected SNPs in the East Asian population compared to the African population using xpEHH
ID	chromosome	SNP	gene name	East Asia vs. Africa Fst			Africa		East Asia		PBS	cancer types
							allele 1	allele 2	allele 1	allele 2
ENST00000283195	2	109401259	RANBP2	0.65			0.23	0.77	0.92	0.08	/	HC,NB,NSPH,PCPG,PRAD,RCCC
ENST00000419308	20	22562438	FOXA2	0.46			0.28	0.72	0.82	0.18	/	UCEC
ENST00000543571	6	150023348	LATS1	0.6			0.86	0.14	0.2	0.8	/	CESC,COREAD,OV,PAAD,SBCC
ENST00000354785	2	216272907	FN1	0.68			0.77	0.23	0.06	0.94	/	LUSC
Positive selected SNPs in the African population compared to the East Asian population using xpEHH
ID	chromosome	SNP	gene name	East Asia vs. Africa Fst			Africa		East Asia		PBS	cancer types
							allele 1	allele 2	allele 1	allele 2
ENST00000306507	2	114257443	FOXD4L1	0.33			0.91	0.09	0.51	0.49	/	MM
Positive selected SNPs in the African population compared to the European population using xpEHH
ID	chromosome	SNP	gene name	Europe vs. Africa Fst			Africa		Europe		PBS	cancer types
							allele 1	allele 2	allele 1	allele 2
ENST00000391945	19	45855524	ERCC2	0.23			0.94	0.06	0.64	0.36	/	BLCA
ENST00000391945	19	45867259	ERCC2	0.23			0.94	0.06	0.63	0.37	/	BLCA
ENST00000391945	19	45854508	ERCC2	0.28			0.95	0.05	0.62	0.38	/	BLCA
ENST00000398117	18	60986837	BCL2	0.31			0.83	0.17	0.41	0.59	/	DLBCL,LY
ENST00000428849	6	33359716	KIFC1	0.29			0.93	0.07	0.57	0.43	/	UCEC
ENST00000428849	6	33377484	KIFC1	0.16			0.89	0.11	0.64	0.36	/	UCEC
Positive selected SNPs in the European population compared to the African population using xpEHH
ID	chromosome	SNP	gene name	Europe vs. Africa Fst			Europe		Africa		PBS	cancer types
							allele 1	allele 2	allele 1	allele 2
ENST00000263640	2	158636910	ACVR1	0.53			0.22	0.78	0.82	0.18	/	HGG,UCEC
ENST00000360351	2	210517915	MAP2	0.34			0.89	0.11	0.46	0.54	/	LY
ENST00000419308	20	22563025	FOXA2	0.43			0.93	0.07	0.44	0.56	/	UCEC
ENST00000419308	20	22563025	FOXA2	0.43			0.93	0.07	0.44	0.56	/	UCEC
ENST00000419308	20	22562438	FOXA2	0.6			0.92	0.08	0.28	0.72	/	UCEC
ENST00000419308	20	22562311	FOXA2	0.39			0.92	0.08	0.47	0.53	/	UCEC
ENST00000524377	1	156848995	NTRK1	0.53			0.29	0.71	0.88	0.12	/	BRCA
ENST00000525166	11	92088177	FAT3	0.59			0.8	0.2	0.15	0.85	/	BCNET,BRCA,CLL,CM,COREAD,DLBCL,ESCA,HNSC,LUSC,PAAD,PRAD,SBCC,ST,THCA
Positive selected SNPs in the East Asian population compared to the European population using xpEHH
ID	chromosome	SNP	gene name	East Asia vs. Europe Fst			East Asia		Europe		PBS	cancer types
							allele 1	allele 2	allele 1	allele 2	East Asia to Europe
ENST00000354785	2	216242917	FN1	0.45			0.2	0.8	0.74	0.26	0.86*	LUSC
ENST00000354785	2	216269209	FN1	0.28			0.94	0.06	0.61	0.39	0.14	LUSC
ENST00000354785	2	216269254	FN1	0.28			0.94	0.06	0.61	0.39	0.14	LUSC
ENST00000354785	2	216272907	FN1	0.62			0.06	0.94	0.72	0.28	1.05*	LUSC
ENST00000360264	7	101837149	CUX1	0.24			0.92	0.08	0.61	0.39	0.27*	BRCA,CM,GBM,LUAD,NSCLC,THCA,UCEC
ENST00000394196	15	93567864	CHD2	0.26			0.95	0.05	0.63	0.37	0.03	BLCA,CLL,OS,RPC
ENST00000409886	2	107084739	RGPD3	0.44			0.18	0.82	0.71	0.29	0.69*	CM,THCA
Positive selected SNPs in the European population compared to the East Asian population using xpEHH
ID	chromosome	SNP	gene name	East Asia vs. Europe Fst			Europe		East Asia		PBS	cancer types
							allele 1	allele 2	allele 1	allele 2	Europe to East Asia
ENST00000261609	15	28467246	HERC2	0.55			0.23	0.77	0.84	0.16	0.88*	THCA
ENST00000261609	15	28422609	HERC2	0.29			0.94	0.06	0.59	0.41	-0.05	THCA
ENST00000261609	15	28502279	HERC2	0.47			0.18	0.82	0.74	0.26	0.72*	THCA
Positive selected SNPs in the African population compared to the South Asian population using xpEHH
ID	chromosome	SNP	gene name	South Asia vs. Africa Fst			Africa		South Asia		PBS	cancer types
							allele 1	allele 2	allele 1	allele 2
ENST00000377767	13	73350079	DIS3	0.32			0.91	0.09	0.52	0.48	/	MM
ENST00000391945	19	45855524	ERCC2	0.2			0.94	0.06	0.68	0.32	/	BLCA
Positive selected SNPs in the South Asian population compared to the African population using xpEHH
ID	chromosome	SNP	gene name	South Asia vs. Africa Fst			South Asia		Africa		PBS	cancer types
							allele 1	allele 2	allele 1	allele 2
ENST00000219476	16	2138269	TSC2	0.66			0.93	0.07	0.23	0.77	/	ACY,BLCA,HC,PAIS,RCH,SSCC
ENST00000381989	13	25021154	PARP4	0.45			0.32	0.68	0.85	0.15	/	COREAD,MM
ENST00000381989	13	25021211	PARP4	0.48			0.05	0.95	0.59	0.41	/	COREAD,MM
ENST00000455521	19	40579842	ZNF780A	0.47			0.77	0.23	0.21	0.79	/	NSPH
ENST00000455521	19	40579468	ZNF780A	0.36			0.85	0.15	0.39	0.61	/	NSPH
ENST00000419308	20	22562438	FOXA2	0.56			0.89	0.11	0.28	0.72	/	UCEC
ENST00000419308	20	22563025	FOXA2	0.37			0.89	0.11	0.44	0.56	/	UCEC
ENST00000525166	11	92088177	FAT3	0.6			0.81	0.19	0.15	0.85	/	BCNET,BRCA,CLL,CM,COREAD,DLBCL,ESCA,HNSC,LUSC,PAAD,PRAD,SBCC,ST,THCA
Positive selected SNPs in the East Asian population compared to the South Asian population using xpEHH
ID	chromosome	SNP	gene name	East Asia vs. South Asia Fst			East Asia		South Asia		PBS	cancer types
							allele 1	allele 2	allele 1	allele 2	East Asia to South Asia
ENST00000254322	19	14629150	DNAJB1	0.25			0.89	0.11	0.55	0.45	0.31*	BLCA
ENST00000262320	16	396264	AXIN1	0.32			0.7	0.3	0.27	0.73	0.55*	ESCA,GBM,HC
ENST00000354785	2	216269209	FN1	0.42			0.94	0.06	0.48	0.52	0.18	LUSC
ENST00000354785	2	216269254	FN1	0.42			0.94	0.06	0.48	0.52	0.18	LUSC
ENST00000354785	2	216272907	FN1	0.63			0.06	0.94	0.72	0.28	1.06*	LUSC
ENST00000354785	2	216300482	FN1	0.33			0.07	0.93	0.45	0.55	0.04	LUSC
ENST00000277541	9	139397707	NOTCH1	0.42			0.12	0.88	0.61	0.39	0.38*	ALL,CESC,CLL,DLBCL,ESCA,HNSC,LGG,LUSC,MBL,MGCT,NSCLC,OV,SBCC,SCLC,SG,SSCC,UCEC,VV
ENST00000283195	2	109401259	RANBP2	0.18			0.92	0.08	0.66	0.34	0.44*	HC,NB,NSPH,PCPG,PRAD,RCCC
ENST00000332351	11	32456694	WT1	0.16			0.93	0.07	0.71	0.29	0.35*	ESCA,PAAD
ENST00000402010	11	63677932	MARK2	0.32			0.12	0.88	0.53	0.47	0.63*	PAAD
ENST00000360264	7	101844851	CUX1	0.2			0.92	0.08	0.63	0.37	0.28*	BRCA,CM,GBM,LUAD,NSCLC,THCA,UCEC
Positive selected SNPs in the South Asian population compared to the East Asian population using xpEHH
ID	chromosome	SNP	gene name	East Asia vs. South Asia Fst			South Asia		East Asia		PBS	cancer types
							allele 1	allele 2	allele 1	allele 2	South Asia to East Asia
ENST00000324288	16	10989219	CIITA	0.16			0.92	0.08	0.68	0.32	-0.01	DLBCL,HNSC
ENST00000435989	19	58385954	ZNF814	0.18			0.84	0.16	0.55	0.45	0.08	VV
ENST00000441802	4	187516880	FAT1	0.26			0.78	0.22	0.4	0.6	0.39*	AN,BCNET,BLCA,BRCA,CESC,CLL,ESCA,HC,HNSC,LUSC,MBL,OV,PAAD,PRAD,SBCC,SSCC,ST,UCEC,UVM,VV
ENST00000441802	4	187525020	FAT1	0.26			0.78	0.22	0.4	0.6	0.46*	AN,BCNET,BLCA,BRCA,CESC,CLL,ESCA,HC,HNSC,LUSC,MBL,OV,PAAD,PRAD,SBCC,SSCC,ST,UCEC,UVM,VV
Positive selected SNPs in the European population compared to the South Asian population using xpEHH
ID	chromosome	SNP	gene name	Europe vs. South Asia Fst			Europe		South Asia		PBS	cancer types
							allele 1	allele 2	allele 1	allele 2	Europe to South Asia
ENST00000243056	12	54339052	HOXC13	0.22			0.28	0.72	0.64	0.36	0.36*	BRCA
ENST00000243056	12	54340077	HOXC13	0.24			0.26	0.74	0.63	0.37	0.38*	BRCA
ENST00000297316	8	55370619	SOX17	0.19			0.87	0.13	0.58	0.42	-0.03	UCEC
ENST00000332351	11	32457138	WT1	0.16			0.63	0.37	0.33	0.67	0.32*	ESCA,PAAD
ENST00000380733	9	15464898	PSIP1	0.2			0.08	0.92	0.35	0.65	0	BLCA
ENST00000399231	15	52603363	MYO5A	0.18			0.39	0.61	0.7	0.3	0.33*	BRCA,NB
ENST00000524377	1	156848995	NTRK1	0.21			0.29	0.71	0.64	0.36	0.41*	BRCA
ENST00000261609	15	28356859	HERC2	0.58			0.3	0.7	0.92	0.08	0.99*	THCA
ENST00000261609	15	28467246	HERC2	0.38			0.23	0.77	0.72	0.28	0.68*	THCA
ENST00000261609	15	28502279	HERC2	0.26			0.18	0.82	0.56	0.44	0.49*	THCA
Positive selected SNPs in the South Asian population compared to the European population using xpEHH
ID	chromosome	SNP	gene name	Europe vs. South Asia Fst			Europe		South Asia		PBS	cancer types
							allele 1	allele 2	allele 1	allele 2	Europe to South Asia
ENST00000526495	14	95554142	DICER1	0.2			0.64	0.36	0.92	0.08	-0.05	COREAD,UCEC
* significantly high PBS value
bold font: PBS value of the gene is not significantly high.
