# Supplementary material for: The adaptive evolution of cancer driver genes
Source: BMC Genomics. 2023 Apr 25;24:215. doi: 10.1186/s12864-023-09301-9 (PMC10131384; doi:10.1186/s12864-023-09301-9)
Supplement: Supplementary file 8 — Additional file 8. [file 12864_2023_9301_MOESM8_ESM.xlsx]

## Sheet: 原始数据
Thyroid cancer incidence in different regions
	Country	region	popuation	incidence
				male	female
Africa	Kenya	Nairobi	3134798	0.6	4.4
	Seychelles	Seychelles	88252	0	3.8
	Uganda	Kyadondo Country	2242928	1.0	1.9
East Asia	China	Beijing	7766138	3.6	11.6
		Anshan City	1465766	1.4	3.8
		Benxi	954268	1.1	3.4
		Cixian County	636102	0.6	2.1
		Guangzhou	8103109	3.5	11.7
		Guanyun	1039332	0.7	4.0
		Haimen County	1013217	1.3	4.6
		Hangzhou	6828599	7.1	21.8
		Harbin City, Nangang District	1011710	3.3	9.9
		Hefei	2186942	1.3	3.7
		Hengdong	729884	0.5	2.2
		Huaiyin District, Huai'an	907939	0.5	1.8
		Jiangmen	633521	3.3	12.8
		Jianhu County	805426	0.3	0.8
		Jiashan County	383595	4.3	14.9
		Jiaxing City	512034	5.8	16.5
		Lianyungang	927993	2.7	6.2
		Linzhou County	1053153	1.0	3.0
		Liuzhou	1039605	1.1	3.6
		Maanshan	635037	2.0	5.0
		Qidong County	1119134	0.9	2.1
		Sheyang	969172	0.8	2.4
		Tongling City	446045	0.6	2.0
		Wuxi	2388979	2.4	6.2
		Xianju	497773	1.4	4.2
		Xiping	864734	0.6	1.7
		Yanshi	612412	0.9	2.4
		Yanting County	604410	0.4	0.5
		Yueyanglou	528118	1.4	3.9
		Zhongshan City	1496923	2.1	7.4
		Zhuhai	1040155	2.5	8.0
		Hong Kong	7036200	2.9	9.9
		Shanghai	6188699	7.6	22.0
		Shenyang	3616075	1.2	3.4
		Wuhan	4807353	3.2	12.7
	Japan	Osaka Prefecture	8865248	2.5	7.3
		Aichi Prefecture	7406467	2.5	7.0
		Fukui Prefecture	805688	5.0	14.3
		Hiroshima Prefecture	2859783	4.6	17.2
		Miyagi Prefecture	2351654	3.0	10.0
		Nagasaki Prefecture	1425628	3.6	10.4
		Niigata Prefecture	2372733	2.9	6.8
		Tochigi Prefecture	2006135	2.8	7.6
		Yamagata Prefecture	1168029	2.5	9.3
	Vitnem	Ho Chi Minh	7535821	2.1	8.4
South Asia	India	Ahmedabad	1569516	0.3	0.9
		Bangalore	7904450	1.4	3.5
		Barshi,Paranda, and Bhum	490116	0.1	0.9
		Bhopal	1885734	0.5	1.5
		Cachar	1716035	0.6	1.5
		Chennai	4626054	1.1	2.7
		Dindigul, Ambilikkai	2143392	0.4	1.2
		Kamrup Urban District	1174779	1.2	2.5
		Kollam	2631986	2.5	8.8
		Mizoram	1082359	0.9	3.3
		Mumbai	13385226	0.9	2.2
		Poona	5585680	0.6	0.9
		Sikkim State	605748	1.5	2.8
		Tripura	3691137	0.3	0.8
		Trivandrum	1188726	3.8	9.7
		Wardha	1302977	0.8	2.2
Europe	Norway	Norway	4891519	2.2	6.4
	Denmark	Denmark	5541244	1.7	4.6
	Italy	Barletta	390186	3.9	18.1
		Bergamo	1081603	5.4	16.3
		Biella	184614	6.6	11.1
		Caserta	904007	4.4	15.3
		Catania,Messina, and Enna	1910865	10.4	29.0
		Como	584364	4.0	11.9
		Cremona	361963	4.5	16.0
		Ferrara	359156	9.6	25.7
		Florence and Prato	1203967	5.8	18.0
		Friuli-Venezia Giulia	1236630	4.6	12.9
		Latina	549820	10.3	29.7
		Lecco	333853	5.0	11.9
		Lombardy, South, Pavia	545284	4.2	12.1
		Mantua	402735	7.4	23.7
		Milan	2752752	4.5	12.8
		Modena	678648	10.6	30.8
		Monza	837364	5.3	14.8
		Napels	565250	6.7	15.7
		Nuoro	217730	10.3	38.5
		Palermo	1245309	5.8	18.4
		Parma	425527	8.8	31.2
		Piacenza	286539	5.2	13.1
		Ragusa and Caltanissetta	581684	4.8	16.9
		Reggio Emilia	529009	9.2	27.8
		Romagna	1227956	10.3	30.0
		Sassari	489215	7.0	25.0
		Sondrio	182013	2.5	8.6
		South Tyrol	502581	2.9	7.2
		Syracuse	399573	5.2	18.5
		Taranto	584886	9.2	29.5
		Trento	514110	4.4	13.0
		Turin	2243905	3.9	11.6
		Umbria	876397	7.0	19.5
		Varese	863573	4.3	12.1
		Veneto	2563934	5.8	14.5
	UK	England	52651116	1.7	4.6
		Scotland	5262100	1.6	4.4
		Northern Ireland	1803054	1.6	4.8
		Wales	3050507	1.5	3.3

## Sheet: 汇总
Group	男性或女性总人口数	男性得病人数	男性未得病	女性得病人数	女性未得病	男性得病率(/10万人）	女性得病率(/10万人）
East Asian	53823369	1675	53821694	5302	53818067	3.1119	9.84989
Europe	50908271	1510	50906761	4297	50903974	2.96641	8.44159
South Asian	25491958	257	25491700	666	25491292	1.00898	2.61212
Africa	2732989	21	2732968	92	2732897	0.754485	3.36445
