# Supplementary material for: The adaptive evolution of cancer driver genes
Source: BMC Genomics. 2023 Apr 25;24:215. doi: 10.1186/s12864-023-09301-9 (PMC10131384; doi:10.1186/s12864-023-09301-9)
Supplement: Supplementary file 9 — Additional file 9. [file 12864_2023_9301_MOESM9_ESM.xlsx]

## Sheet: Sheet1
Compendium_Cancer_Genes
SYMBOL	TRANSCRIPT	CANCER_TYPE
ABCB1	ENST00000622132	ESCA
ABI1	ENST00000376142	ESCA
ABL1	ENST00000372348	HC
ABL1	ENST00000372348	UCEC
ABL2	ENST00000502732	BRCA
ABL2	ENST00000502732	THCA
ABL2	ENST00000502732	UCEC
ACKR3	ENST00000272928	OV
ACSL3	ENST00000357430	AML
ACVR1	ENST00000263640	HGG
ACVR1	ENST00000263640	UCEC
ACVR2A	ENST00000241416	COREAD
ACVR2A	ENST00000241416	HC
ACVR2A	ENST00000241416	PAAD
ACVR2A	ENST00000241416	SSCC
ACVR2A	ENST00000241416	ST
ACVR2A	ENST00000241416	UCEC
ADGRB1	ENST00000517894	AN
AFF1	ENST00000395146	CM
AFF3	ENST00000409579	BRCA
AJUBA	ENST00000262713	HNSC
AKT1	ENST00000554581	ACY
AKT1	ENST00000554581	ALL
AKT1	ENST00000554581	BRCA
AKT1	ENST00000554581	CESC
AKT1	ENST00000554581	OS
AKT1	ENST00000554581	PRAD
AKT1	ENST00000554581	THCA
AKT1	ENST00000554581	UCEC
AKT3	ENST00000263826	PRAD
AKT3	ENST00000263826	SSCC
ALB	ENST00000295897	HC
ALK	ENST00000389048	BRCA
ALK	ENST00000389048	HC
ALK	ENST00000389048	NB
ALK	ENST00000389048	NSCLC
ALK	ENST00000389048	PRAD
ALK	ENST00000389048	SCLC
AMER1	ENST00000330258	COREAD
AMER1	ENST00000330258	WT
APC	ENST00000257430	AN
APC	ENST00000257430	BC
APC	ENST00000257430	CH
APC	ENST00000257430	CM
APC	ENST00000257430	COREAD
APC	ENST00000257430	ESCA
APC	ENST00000257430	HC
APC	ENST00000257430	NSCLC
APC	ENST00000257430	PRAD
APC	ENST00000257430	SBCC
APC	ENST00000257430	SSCC
APC	ENST00000257430	ST
APC	ENST00000257430	UVM
APC	ENST00000257430	VV
AR	ENST00000374690	CH
AR	ENST00000374690	DLBCL
AR	ENST00000374690	MM
AR	ENST00000374690	NSPH
AR	ENST00000374690	PRAD
ARAF	ENST00000290277	CH
ARAF	ENST00000290277	CLL
ARHGAP35	ENST00000404338	LUSC
ARHGAP35	ENST00000404338	UCEC
ARHGAP5	ENST00000345122	BLCA
ARHGAP5	ENST00000345122	MM
ARHGEF10	ENST00000518288	ANGS
ARHGEF10	ENST00000518288	NSCLC
ARHGEF10	ENST00000518288	SCLC
ARHGEF10	ENST00000518288	SSCC
ARHGEF10L	ENST00000361221	MBL
ARHGEF10L	ENST00000361221	SBCC
ARHGEF10L	ENST00000361221	ST
ARHGEF12	ENST00000397843	BRCA
ARHGEF12	ENST00000397843	ST
ARID1A	ENST00000324856	BLCA
ARID1A	ENST00000324856	BLY
ARID1A	ENST00000324856	BRCA
ARID1A	ENST00000324856	CESC
ARID1A	ENST00000324856	CH
ARID1A	ENST00000324856	CLL
ARID1A	ENST00000324856	COREAD
ARID1A	ENST00000324856	DLBCL
ARID1A	ENST00000324856	ESCA
ARID1A	ENST00000324856	GBM
ARID1A	ENST00000324856	HC
ARID1A	ENST00000324856	LGG
ARID1A	ENST00000324856	LUAD
ARID1A	ENST00000324856	LUSC
ARID1A	ENST00000324856	MBL
ARID1A	ENST00000324856	NHLY
ARID1A	ENST00000324856	NSCLC
ARID1A	ENST00000324856	OS
ARID1A	ENST00000324856	OV
ARID1A	ENST00000324856	PAAD
ARID1A	ENST00000324856	PIA
ARID1A	ENST00000324856	PRAD
ARID1A	ENST00000324856	RCCC
ARID1A	ENST00000324856	RPC
ARID1A	ENST00000324856	SBCC
ARID1A	ENST00000324856	SCLC
ARID1A	ENST00000324856	ST
ARID1A	ENST00000324856	UCEC
ARID1A	ENST00000324856	UCS
ARID1B	ENST00000346085	BLCA
ARID1B	ENST00000346085	BRCA
ARID1B	ENST00000346085	COREAD
ARID1B	ENST00000346085	DLBCL
ARID1B	ENST00000346085	HC
ARID1B	ENST00000346085	HGG
ARID1B	ENST00000346085	LGG
ARID1B	ENST00000346085	LUSC
ARID1B	ENST00000346085	MBL
ARID1B	ENST00000346085	PAAD
ARID1B	ENST00000346085	PIA
ARID2	ENST00000334344	BLCA
ARID2	ENST00000334344	CH
ARID2	ENST00000334344	CM
ARID2	ENST00000334344	ESCA
ARID2	ENST00000334344	HC
ARID2	ENST00000334344	HNSC
ARID2	ENST00000334344	LGG
ARID2	ENST00000334344	LUAD
ARID2	ENST00000334344	MBL
ARID2	ENST00000334344	NSCLC
ARID2	ENST00000334344	PAAD
ARID2	ENST00000334344	PIA
ARID2	ENST00000334344	SSCC
ARID2	ENST00000334344	ST
ARID2	ENST00000334344	THCA
ASXL1	ENST00000375687	ALL
ASXL1	ENST00000375687	AML
ASXL1	ENST00000375687	BRCA
ASXL1	ENST00000375687	CLL
ASXL1	ENST00000375687	ESCA
ASXL1	ENST00000375687	HGG
ASXL1	ENST00000375687	HNSC
ASXL1	ENST00000375687	MBL
ASXL1	ENST00000375687	PIA
ASXL1	ENST00000375687	PRAD
ASXL1	ENST00000375687	RCCC
ASXL2	ENST00000404843	AML
ASXL2	ENST00000404843	BLCA
ATF7IP	ENST00000544627	LUAD
ATF7IP	ENST00000544627	UCEC
ATG7	ENST00000354449	RCCC
ATM	ENST00000278616	BLCA
ATM	ENST00000278616	BRCA
ATM	ENST00000278616	CH
ATM	ENST00000278616	CLL
ATM	ENST00000278616	COREAD
ATM	ENST00000278616	ESCA
ATM	ENST00000278616	HC
ATM	ENST00000278616	HGG
ATM	ENST00000278616	LUAD
ATM	ENST00000278616	MM
ATM	ENST00000278616	NB
ATM	ENST00000278616	NSCLC
ATM	ENST00000278616	PAAD
ATM	ENST00000278616	PAIS
ATM	ENST00000278616	PRAD
ATM	ENST00000278616	RCCC
ATM	ENST00000278616	SCLC
ATM	ENST00000278616	ST
ATM	ENST00000278616	THCA
ATM	ENST00000278616	UCEC
ATR	ENST00000350721	CM
ATR	ENST00000350721	UCEC
ATRX	ENST00000373344	ACC
ATRX	ENST00000373344	CLL
ATRX	ENST00000373344	GBM
ATRX	ENST00000373344	HGG
ATRX	ENST00000373344	LEIS
ATRX	ENST00000373344	LGG
ATRX	ENST00000373344	NB
ATRX	ENST00000373344	OS
ATRX	ENST00000373344	OV
ATRX	ENST00000373344	PAIS
ATRX	ENST00000373344	PIA
ATRX	ENST00000373344	S
AXIN1	ENST00000262320	ESCA
AXIN1	ENST00000262320	GBM
AXIN1	ENST00000262320	HC
AXIN2	ENST00000307078	HC
B2M	ENST00000558401	CESC
B2M	ENST00000558401	DLBCL
B2M	ENST00000558401	HNSC
B2M	ENST00000558401	LY
B2M	ENST00000558401	NHLY
B2M	ENST00000558401	NSCLC
BAP1	ENST00000460680	BRCA
BAP1	ENST00000460680	CESC
BAP1	ENST00000460680	CH
BAP1	ENST00000460680	CM
BAP1	ENST00000460680	ESCA
BAP1	ENST00000460680	HC
BAP1	ENST00000460680	MESO
BAP1	ENST00000460680	NSCLC
BAP1	ENST00000460680	PAAD
BAP1	ENST00000460680	RCCC
BAP1	ENST00000460680	RPC
BAP1	ENST00000460680	UVM
BCL10	ENST00000370580	DLBCL
BCL11A	ENST00000642384	NHLY
BCL11B	ENST00000357195	DLBCL
BCL11B	ENST00000357195	GBM
BCL11B	ENST00000357195	PAAD
BCL11B	ENST00000357195	VV
BCL2	ENST00000398117	DLBCL
BCL2	ENST00000398117	LY
BCL2L12	ENST00000616144	CM
BCL6	ENST00000406870	DLBCL
BCL6	ENST00000406870	NHLY
BCL7A	ENST00000538010	DLBCL
BCL7A	ENST00000538010	MM
BCL9	ENST00000234739	COREAD
BCL9	ENST00000234739	ST
BCL9L	ENST00000334801	COREAD
BCLAF1	ENST00000531224	AML
BCLAF1	ENST00000531224	CM
BCLAF1	ENST00000531224	ST
BCOR	ENST00000378444	ACC
BCOR	ENST00000378444	ALL
BCOR	ENST00000378444	AML
BCOR	ENST00000378444	CH
BCOR	ENST00000378444	CLL
BCOR	ENST00000378444	COREAD
BCOR	ENST00000378444	EWS
BCOR	ENST00000378444	GBM
BCOR	ENST00000378444	MBL
BCOR	ENST00000378444	PIA
BCOR	ENST00000378444	ST
BCOR	ENST00000378444	THYM
BCOR	ENST00000378444	UCEC
BCOR	ENST00000378444	UCS
BCORL1	ENST00000540052	COREAD
BCORL1	ENST00000540052	HGG
BCORL1	ENST00000540052	NB
BCORL1	ENST00000540052	OS
BCORL1	ENST00000540052	PAAD
BCR	ENST00000305877	CLL
BCR	ENST00000305877	DLBCL
BCR	ENST00000305877	LUSC
BCR	ENST00000305877	LY
BCR	ENST00000305877	SCLC
BIRC3	ENST00000263464	CLL
BIRC6	ENST00000421745	BLCA
BIRC6	ENST00000421745	CH
BIRC6	ENST00000421745	COREAD
BIRC6	ENST00000421745	DLBCL
BIRC6	ENST00000421745	ESCA
BIRC6	ENST00000421745	HC
BIRC6	ENST00000421745	HNSC
BIRC6	ENST00000421745	MGCT
BIRC6	ENST00000421745	NHLY
BIRC6	ENST00000421745	PAAD
BIRC6	ENST00000421745	PCPG
BIRC6	ENST00000421745	UCEC
BMPR1A	ENST00000372037	COREAD
BMPR1A	ENST00000372037	ST
BMPR2	ENST00000374580	ST
BRAF	ENST00000646891	BLCA
BRAF	ENST00000646891	BRCA
BRAF	ENST00000646891	CLL
BRAF	ENST00000646891	CM
BRAF	ENST00000646891	COREAD
BRAF	ENST00000646891	DLBCL
BRAF	ENST00000646891	GBM
BRAF	ENST00000646891	HGG
BRAF	ENST00000646891	LGG
BRAF	ENST00000646891	LUAD
BRAF	ENST00000646891	LUSC
BRAF	ENST00000646891	MM
BRAF	ENST00000646891	NSCLC
BRAF	ENST00000646891	OV
BRAF	ENST00000646891	PIA
BRAF	ENST00000646891	PRAD
BRAF	ENST00000646891	RPC
BRAF	ENST00000646891	THCA
BRAF	ENST00000646891	UCEC
BRCA1	ENST00000471181	BRCA
BRCA1	ENST00000471181	OV
BRCA2	ENST00000380152	BLCA
BRCA2	ENST00000380152	BRCA
BRCA2	ENST00000380152	CM
BRCA2	ENST00000380152	COREAD
BRCA2	ENST00000380152	HNSC
BRCA2	ENST00000380152	MBL
BRCA2	ENST00000380152	OV
BRCA2	ENST00000380152	PAAD
BRCA2	ENST00000380152	PRAD
BRCA2	ENST00000380152	VV
BRD4	ENST00000263377	BLCA
BRD4	ENST00000263377	PRAD
BRD7	ENST00000394689	CM
BRD7	ENST00000394689	HC
BTG1	ENST00000256015	CLL
BTG1	ENST00000256015	DLBCL
BTG1	ENST00000256015	LY
BTG1	ENST00000256015	MM
BTG1	ENST00000256015	NHLY
BTK	ENST00000621635	LUAD
BTK	ENST00000621635	NHLY
CACNA1D	ENST00000288139	BRCA
CACNA1D	ENST00000288139	GBM
CACNA1D	ENST00000288139	HC
CACNA1D	ENST00000288139	OV
CACNA1D	ENST00000288139	ST
CAMTA1	ENST00000303635	HC
CARD11	ENST00000396946	BLY
CARD11	ENST00000396946	COREAD
CARD11	ENST00000396946	DLBCL
CARD11	ENST00000396946	HC
CARD11	ENST00000396946	LY
CARD11	ENST00000396946	NHLY
CARS	ENST00000380525	ST
CASP8	ENST00000358485	BLCA
CASP8	ENST00000358485	BRCA
CASP8	ENST00000358485	CESC
CASP8	ENST00000358485	HNSC
CASP8	ENST00000358485	SBCC
CASP8	ENST00000358485	ST
CASP8	ENST00000358485	VV
CASZ1	ENST00000377022	PRAD
CBFA2T3	ENST00000268679	CESC
CBFB	ENST00000412916	BRCA
CBL	ENST00000264033	ALL
CBL	ENST00000264033	AML
CCDC6	ENST00000263102	COREAD
CCND1	ENST00000227507	MM
CCND1	ENST00000227507	UCEC
CCND2	ENST00000261254	AML
CCND2	ENST00000261254	CLL
CCND3	ENST00000372991	BLY
CCND3	ENST00000372991	DLBCL
CCND3	ENST00000372991	LY
CCND3	ENST00000372991	NHLY
CCR7	ENST00000246657	DLBCL
CD58	ENST00000369489	DLBCL
CD58	ENST00000369489	NHLY
CD79B	ENST00000392795	DLBCL
CD79B	ENST00000392795	NHLY
CDC73	ENST00000367435	LUAD
CDH1	ENST00000261769	BLCA
CDH1	ENST00000261769	BRCA
CDH1	ENST00000261769	DLBCL
CDH1	ENST00000261769	SSCC
CDH1	ENST00000261769	ST
CDH10	ENST00000264463	LUAD
CDH10	ENST00000264463	LUSC
CDH10	ENST00000264463	PAAD
CDH11	ENST00000268603	CH
CDH11	ENST00000268603	CM
CDH11	ENST00000268603	ESCA
CDH11	ENST00000268603	HC
CDH11	ENST00000268603	LUSC
CDH11	ENST00000268603	ST
CDK12	ENST00000447079	CESC
CDK12	ENST00000447079	CM
CDK12	ENST00000447079	OV
CDK12	ENST00000447079	PRAD
CDK12	ENST00000447079	ST
CDK4	ENST00000257904	CM
CDKN1A	ENST00000405375	BLCA
CDKN1A	ENST00000405375	HC
CDKN1A	ENST00000405375	RCH
CDKN1B	ENST00000228872	BCNET
CDKN1B	ENST00000228872	BRCA
CDKN1B	ENST00000228872	DLBCL
CDKN1B	ENST00000228872	HC
CDKN1B	ENST00000228872	MM
CDKN1B	ENST00000228872	PRAD
CDKN2A	ENST00000498124	ACY
CDKN2A	ENST00000498124	BLCA
CDKN2A	ENST00000498124	BRCA
CDKN2A	ENST00000498124	CH
CDKN2A	ENST00000498124	CM
CDKN2A	ENST00000498124	ESCA
CDKN2A	ENST00000498124	GBM
CDKN2A	ENST00000498124	HC
CDKN2A	ENST00000498124	HNSC
CDKN2A	ENST00000498124	LGG
CDKN2A	ENST00000498124	LUAD
CDKN2A	ENST00000498124	LUSC
CDKN2A	ENST00000498124	NSCLC
CDKN2A	ENST00000498124	OS
CDKN2A	ENST00000498124	PAAD
CDKN2A	ENST00000498124	RCCC
CDKN2A	ENST00000498124	SSCC
CDKN2A	ENST00000498124	ST
CDKN2A	ENST00000498124	VV
CDKN2C	ENST00000262662	HGG
CDKN2C	ENST00000262662	LGG
CDX2	ENST00000381020	ESCA
CEBPA	ENST00000498907	AML
CHD2	ENST00000394196	BLCA
CHD2	ENST00000394196	CLL
CHD2	ENST00000394196	OS
CHD2	ENST00000394196	RPC
CHD4	ENST00000544040	ALL
CHD4	ENST00000544040	BLCA
CHD4	ENST00000544040	RCH
CHD4	ENST00000544040	UCEC
CHD4	ENST00000544040	UCS
CHEK2	ENST00000382580	THCA
CIC	ENST00000575354	LGG
CIC	ENST00000575354	LUAD
CIITA	ENST00000618327	DLBCL
CIITA	ENST00000618327	HNSC
CLIP1	ENST00000620786	BC
CLIP1	ENST00000620786	CESC
CLIP1	ENST00000620786	LUAD
CLIP1	ENST00000620786	ST
CLTC	ENST00000621829	BRCA
CLTC	ENST00000621829	CH
CLTC	ENST00000621829	HC
CLTCL1	ENST00000427926	HC
CMTR2	ENST00000338099	LUAD
CMTR2	ENST00000338099	NSCLC
CNOT3	ENST00000358389	CLL
CNOT3	ENST00000358389	PRAD
CNOT9	ENST00000627282	CM
COL1A1	ENST00000225964	CESC
COL1A1	ENST00000225964	CM
COL1A1	ENST00000225964	GBM
COL1A1	ENST00000225964	MM
COL1A1	ENST00000225964	SBCC
CPEB3	ENST00000614585	SBCC
CR1	ENST00000367049	AML
CR1	ENST00000367049	MM
CREBBP	ENST00000262367	ALL
CREBBP	ENST00000262367	BLCA
CREBBP	ENST00000262367	BRCA
CREBBP	ENST00000262367	CLL
CREBBP	ENST00000262367	DLBCL
CREBBP	ENST00000262367	ESCA
CREBBP	ENST00000262367	HC
CREBBP	ENST00000262367	HNSC
CREBBP	ENST00000262367	LUSC
CREBBP	ENST00000262367	LY
CREBBP	ENST00000262367	MBL
CREBBP	ENST00000262367	NHLY
CREBBP	ENST00000262367	PAIS
CREBBP	ENST00000262367	PIA
CREBBP	ENST00000262367	SBCC
CREBBP	ENST00000262367	SCLC
CREBBP	ENST00000262367	SG
CREBBP	ENST00000262367	VV
CRNKL1	ENST00000377340	CM
CRTC1	ENST00000338797	ACY
CSF3R	ENST00000373103	AML
CTCF	ENST00000646076	ALL
CTCF	ENST00000646076	AML
CTCF	ENST00000646076	BRCA
CTCF	ENST00000646076	HNSC
CTCF	ENST00000646076	NSCLC
CTCF	ENST00000646076	UCEC
CTNNB1	ENST00000645320	ACC
CTNNB1	ENST00000645320	COREAD
CTNNB1	ENST00000645320	HBC
CTNNB1	ENST00000645320	HC
CTNNB1	ENST00000645320	LUAD
CTNNB1	ENST00000645320	MBL
CTNNB1	ENST00000645320	NSCLC
CTNNB1	ENST00000645320	PIA
CTNNB1	ENST00000645320	PRAD
CTNNB1	ENST00000645320	RHBDS
CTNNB1	ENST00000645320	SBCC
CTNNB1	ENST00000645320	ST
CTNNB1	ENST00000645320	UCEC
CTNNB1	ENST00000645320	WT
CUL3	ENST00000264414	HNSC
CUL3	ENST00000264414	LUSC
CUL3	ENST00000264414	NSCLC
CUL3	ENST00000264414	PRAD
CUL3	ENST00000264414	RPC
CUX1	ENST00000360264	BRCA
CUX1	ENST00000360264	CM
CUX1	ENST00000360264	GBM
CUX1	ENST00000360264	LUAD
CUX1	ENST00000360264	NSCLC
CUX1	ENST00000360264	THCA
CUX1	ENST00000360264	UCEC
CXCR4	ENST00000409817	DLBCL
CYLD	ENST00000427738	HNSC
CYLD	ENST00000427738	MM
CYLD	ENST00000427738	NSPH
CYLD	ENST00000427738	THYM
CYP2C8	ENST00000371270	CM
CYP2C8	ENST00000371270	MESO
CYSLTR2	ENST00000282018	UVM
DAXX	ENST00000374542	ACC
DAXX	ENST00000374542	PAIS
DAZAP1	ENST00000233078	DLBCL
DCAF12L2	ENST00000360028	GBM
DCAF12L2	ENST00000360028	PRAD
DCC	ENST00000442544	ESCA
DCC	ENST00000442544	PAAD
DCSTAMP	ENST00000297581	ST
DDB2	ENST00000256996	AML
DDX3X	ENST00000644876	BLY
DDX3X	ENST00000644876	BRCA
DDX3X	ENST00000644876	CLL
DDX3X	ENST00000644876	CM
DDX3X	ENST00000644876	DLBCL
DDX3X	ENST00000644876	HNSC
DDX3X	ENST00000644876	LY
DDX3X	ENST00000644876	MBL
DDX3X	ENST00000644876	MESO
DDX3X	ENST00000644876	NHLY
DDX3X	ENST00000644876	PIA
DDX6	ENST00000620157	MBL
DGCR8	ENST00000351989	DLBCL
DGCR8	ENST00000351989	THCA
DGCR8	ENST00000351989	WT
DHX9	ENST00000367549	HC
DICER1	ENST00000526495	COREAD
DICER1	ENST00000526495	UCEC
DIS3	ENST00000377767	MM
DNAJB1	ENST00000254322	BLCA
DNMT3A	ENST00000264709	AML
DNMT3A	ENST00000264709	HC
DNMT3A	ENST00000264709	LGG
DNMT3A	ENST00000264709	MDPS
DNMT3A	ENST00000264709	PRAD
DNMT3A	ENST00000264709	RPC
DNMT3A	ENST00000264709	THCA
DOT1L	ENST00000398665	DLBCL
DROSHA	ENST00000511367	LUSC
DROSHA	ENST00000511367	WT
DTX1	ENST00000257600	CLL
DUSP16	ENST00000298573	COREAD
EBF1	ENST00000313708	DLBCL
EBF1	ENST00000313708	LUSC
EBF1	ENST00000313708	NHLY
EFTUD2	ENST00000426333	MM
EGFR	ENST00000275493	BRCA
EGFR	ENST00000275493	COREAD
EGFR	ENST00000275493	GBM
EGFR	ENST00000275493	HGG
EGFR	ENST00000275493	LGG
EGFR	ENST00000275493	LUAD
EGFR	ENST00000275493	MM
EGFR	ENST00000275493	NSCLC
EGFR	ENST00000275493	PIA
EGR2	ENST00000242480	CLL
EHD2	ENST00000263277	PRAD
EIF1AX	ENST00000379607	PRAD
EIF1AX	ENST00000379607	THCA
EIF1AX	ENST00000379607	THYM
EIF1AX	ENST00000379607	UCEC
EIF1AX	ENST00000379607	UVM
EIF3E	ENST00000220849	CESC
EIF3E	ENST00000220849	COREAD
ELF3	ENST00000359651	BLCA
ELF3	ENST00000359651	CH
ELF4	ENST00000308167	AML
ELL	ENST00000262809	CM
ELL	ENST00000262809	HNSC
ELL	ENST00000262809	OV
ELN	ENST00000358929	BRCA
EML4	ENST00000318522	ESCA
EML4	ENST00000318522	SCLC
ENPEP	ENST00000265162	BC
EP300	ENST00000263253	BLCA
EP300	ENST00000263253	CESC
EP300	ENST00000263253	COREAD
EP300	ENST00000263253	DLBCL
EP300	ENST00000263253	ESCA
EP300	ENST00000263253	HC
EP300	ENST00000263253	HNSC
EP300	ENST00000263253	LUSC
EP300	ENST00000263253	MBL
EP300	ENST00000263253	NHLY
EP300	ENST00000263253	NSPH
EP300	ENST00000263253	SCLC
EPAS1	ENST00000263734	BRCA
EPAS1	ENST00000263734	PCPG
EPAS1	ENST00000263734	SSCC
EPHA2	ENST00000358432	CH
EPHA3	ENST00000336596	BRCA
EPHA3	ENST00000336596	CM
EPHA3	ENST00000336596	COREAD
EPHA3	ENST00000336596	ESCA
EPHA3	ENST00000336596	PRAD
EPHA7	ENST00000369303	LUAD
EPHA7	ENST00000369303	OV
EPHA7	ENST00000369303	THCA
EPS15	ENST00000371733	PRAD
ERBB2	ENST00000269571	BLCA
ERBB2	ENST00000269571	BRCA
ERBB2	ENST00000269571	CESC
ERBB2	ENST00000269571	CH
ERBB2	ENST00000269571	COREAD
ERBB2	ENST00000269571	ESCA
ERBB2	ENST00000269571	NSCLC
ERBB2	ENST00000269571	OV
ERBB2	ENST00000269571	RPC
ERBB2	ENST00000269571	ST
ERBB3	ENST00000267101	BLCA
ERBB3	ENST00000267101	BRCA
ERBB3	ENST00000267101	CESC
ERBB3	ENST00000267101	CH
ERBB3	ENST00000267101	COREAD
ERBB3	ENST00000267101	NB
ERBB3	ENST00000267101	PRAD
ERBB3	ENST00000267101	ST
ERBB3	ENST00000267101	UCEC
ERBB3	ENST00000267101	UCS
ERBB4	ENST00000342788	BLCA
ERBB4	ENST00000342788	BRCA
ERBB4	ENST00000342788	ESCA
ERCC2	ENST00000391945	BLCA
ERCC3	ENST00000285398	CM
ERG	ENST00000417133	OV
ERG	ENST00000417133	PRAD
ESR1	ENST00000440973	BRCA
ESR1	ENST00000440973	LUSC
ESR1	ENST00000440973	OS
ESR1	ENST00000440973	SBCC
ESR1	ENST00000440973	UCEC
ESRRA	ENST00000405666	ACY
ETV4	ENST00000319349	NB
ETV5	ENST00000306376	AML
ETV5	ENST00000306376	BRCA
ETV6	ENST00000396373	ALL
ETV6	ENST00000396373	DLBCL
ETV6	ENST00000396373	NHLY
EWSR1	ENST00000414183	EWS
EXT2	ENST00000395673	CH
EZH2	ENST00000320356	ALL
EZH2	ENST00000320356	AML
EZH2	ENST00000320356	DLBCL
EZH2	ENST00000320356	EWS
EZH2	ENST00000320356	LUAD
EZH2	ENST00000320356	LY
EZH2	ENST00000320356	NHLY
FAM135B	ENST00000395297	ESCA
FAM135B	ENST00000395297	HNSC
FAM135B	ENST00000395297	LUSC
FAM135B	ENST00000395297	PAAD
FAM135B	ENST00000395297	UCS
FAM174B	ENST00000327355	MBL
FAM174B	ENST00000327355	PIA
FAM174B	ENST00000327355	PRAD
FAM186A	ENST00000327337	DLBCL
FAM186A	ENST00000327337	THCA
FAM46C	ENST00000369448	MM
FANCA	ENST00000389301	VV
FANCC	ENST00000289081	GBM
FANCD2	ENST00000287647	CM
FANCD2	ENST00000287647	COREAD
FANCF	ENST00000327470	BLCA
FAS	ENST00000355740	CESC
FAS	ENST00000355740	DLBCL
FAT1	ENST00000441802	AN
FAT1	ENST00000441802	BCNET
FAT1	ENST00000441802	BLCA
FAT1	ENST00000441802	BRCA
FAT1	ENST00000441802	CESC
FAT1	ENST00000441802	CLL
FAT1	ENST00000441802	ESCA
FAT1	ENST00000441802	HC
FAT1	ENST00000441802	HNSC
FAT1	ENST00000441802	LUSC
FAT1	ENST00000441802	MBL
FAT1	ENST00000441802	OV
FAT1	ENST00000441802	PAAD
FAT1	ENST00000441802	PRAD
FAT1	ENST00000441802	SBCC
FAT1	ENST00000441802	SSCC
FAT1	ENST00000441802	ST
FAT1	ENST00000441802	UCEC
FAT1	ENST00000441802	UVM
FAT1	ENST00000441802	VV
FAT2	ENST00000261800	VV
FAT3	ENST00000525166	BCNET
FAT3	ENST00000525166	BRCA
FAT3	ENST00000525166	CLL
FAT3	ENST00000525166	CM
FAT3	ENST00000525166	COREAD
FAT3	ENST00000525166	DLBCL
FAT3	ENST00000525166	ESCA
FAT3	ENST00000525166	HNSC
FAT3	ENST00000525166	LUSC
FAT3	ENST00000525166	PAAD
FAT3	ENST00000525166	PRAD
FAT3	ENST00000525166	SBCC
FAT3	ENST00000525166	ST
FAT3	ENST00000525166	THCA
FAT4	ENST00000394329	ACC
FAT4	ENST00000394329	ALL
FAT4	ENST00000394329	AML
FAT4	ENST00000394329	BRCA
FAT4	ENST00000394329	CLL
FAT4	ENST00000394329	CM
FAT4	ENST00000394329	COREAD
FAT4	ENST00000394329	DLBCL
FAT4	ENST00000394329	ESCA
FAT4	ENST00000394329	GBM
FAT4	ENST00000394329	HC
FAT4	ENST00000394329	HNSC
FAT4	ENST00000394329	LUAD
FAT4	ENST00000394329	LY
FAT4	ENST00000394329	MESO
FAT4	ENST00000394329	MGCT
FAT4	ENST00000394329	MM
FAT4	ENST00000394329	NSCLC
FAT4	ENST00000394329	PAAD
FAT4	ENST00000394329	PAIS
FAT4	ENST00000394329	PRAD
FAT4	ENST00000394329	SBCC
FAT4	ENST00000394329	SCLC
FAT4	ENST00000394329	ST
FBLN1	ENST00000327858	BC
FBN2	ENST00000508053	HNSC
FBN2	ENST00000508053	NB
FBXO11	ENST00000403359	BLY
FBXO11	ENST00000403359	NHLY
FBXW7	ENST00000603548	BLCA
FBXW7	ENST00000603548	BRCA
FBXW7	ENST00000603548	CESC
FBXW7	ENST00000603548	CH
FBXW7	ENST00000603548	CLL
FBXW7	ENST00000603548	COREAD
FBXW7	ENST00000603548	ESCA
FBXW7	ENST00000603548	HNSC
FBXW7	ENST00000603548	LUSC
FBXW7	ENST00000603548	MBL
FBXW7	ENST00000603548	NSPH
FBXW7	ENST00000603548	PAAD
FBXW7	ENST00000603548	PIA
FBXW7	ENST00000603548	ST
FBXW7	ENST00000603548	UCEC
FBXW7	ENST00000603548	UCS
FGD5	ENST00000285046	AML
FGFR1	ENST00000425967	BLCA
FGFR1	ENST00000425967	MBL
FGFR1	ENST00000425967	OV
FGFR1	ENST00000425967	PCPG
FGFR1	ENST00000425967	PIA
FGFR1	ENST00000425967	PRAD
FGFR2	ENST00000457416	BRCA
FGFR2	ENST00000457416	CH
FGFR2	ENST00000457416	LUSC
FGFR2	ENST00000457416	SG
FGFR2	ENST00000457416	UCEC
FGFR3	ENST00000340107	BLCA
FGFR3	ENST00000340107	HNSC
FGFR3	ENST00000340107	LUSC
FGFR3	ENST00000340107	MESO
FGFR3	ENST00000340107	MM
FGFR4	ENST00000292408	GBM
FH	ENST00000366560	NSCLC
FHIT	ENST00000468189	DLBCL
FHIT	ENST00000468189	ST
FLCN	ENST00000285071	COREAD
FLT3	ENST00000241453	ALL
FLT3	ENST00000241453	AML
FLT4	ENST00000261937	ANGS
FLT4	ENST00000261937	BLCA
FLT4	ENST00000261937	HC
FLT4	ENST00000261937	LUAD
FLT4	ENST00000261937	LUSC
FLT4	ENST00000261937	NB
FLT4	ENST00000261937	SBCC
FN1	ENST00000354785	LUSC
FOXA1	ENST00000250448	BRCA
FOXA1	ENST00000250448	PRAD
FOXA2	ENST00000419308	UCEC
FOXD4L1	ENST00000306507	MM
FOXL2	ENST00000330315	OV
FOXO1	ENST00000379561	BLY
FOXO1	ENST00000379561	NHLY
FOXO3	ENST00000406360	MBL
FOXP1	ENST00000615603	AN
FOXP1	ENST00000615603	PRAD
FUBP1	ENST00000370768	CLL
FUBP1	ENST00000370768	LGG
GATA1	ENST00000376670	BRCA
GATA2	ENST00000341105	AML
GATA3	ENST00000379328	ALL
GATA3	ENST00000379328	BRCA
GLI1	ENST00000228682	LEIS
GMPS	ENST00000496455	HC
GNA11	ENST00000078429	CM
GNA11	ENST00000078429	UVM
GNA13	ENST00000439174	BLCA
GNA13	ENST00000439174	DLBCL
GNAI2	ENST00000313601	NHLY
GNAQ	ENST00000286548	CM
GNAQ	ENST00000286548	UVM
GNAS	ENST00000371100	ACC
GNAS	ENST00000371100	BCNET
GNAS	ENST00000371100	BRCA
GNAS	ENST00000371100	CH
GNAS	ENST00000371100	COREAD
GNAS	ENST00000371100	ESCA
GNAS	ENST00000371100	HC
GNAS	ENST00000371100	MBL
GNAS	ENST00000371100	PAAD
GRIN2A	ENST00000396573	BLCA
GRIN2A	ENST00000396573	BRCA
GRIN2A	ENST00000396573	COREAD
GRIN2A	ENST00000396573	ST
GTF2I	ENST00000573035	AN
GTF2I	ENST00000573035	THYM
H3F3A	ENST00000366813	HGG
H3F3A	ENST00000366813	PIA
HERC2	ENST00000261609	THCA
HGF	ENST00000222390	BC
HIP1	ENST00000336926	MBL
HIP1	ENST00000336926	UCS
HIST1H3B	ENST00000621411	BLCA
HIST1H3B	ENST00000621411	BRCA
HIST1H3B	ENST00000621411	ESCA
HIST1H4I	ENST00000615353	CLL
HLA-A	ENST00000396634	AML
HLA-A	ENST00000396634	BLCA
HLA-A	ENST00000396634	CESC
HLA-A	ENST00000396634	CM
HLA-A	ENST00000396634	DLBCL
HLA-A	ENST00000396634	HNSC
HLA-A	ENST00000396634	LUSC
HLA-A	ENST00000396634	NSPH
HLA-A	ENST00000396634	PIA
HLA-B	ENST00000412585	CESC
HLA-B	ENST00000412585	DLBCL
HLA-B	ENST00000412585	ESCA
HLA-B	ENST00000412585	HNSC
HLA-B	ENST00000412585	LY
HNF1A	ENST00000544413	HC
HNRNPA2B1	ENST00000354667	HC
HOXA11	ENST00000006015	UCEC
HOXC13	ENST00000243056	BRCA
HOXD13	ENST00000392539	BRCA
HOXD13	ENST00000392539	ESCA
HRAS	ENST00000451590	BLCA
HRAS	ENST00000451590	BRCA
HRAS	ENST00000451590	CM
HRAS	ENST00000451590	COREAD
HRAS	ENST00000451590	HNSC
HRAS	ENST00000451590	LUSC
HRAS	ENST00000451590	PCPG
HRAS	ENST00000451590	PRAD
HRAS	ENST00000451590	SSCC
HRAS	ENST00000451590	THCA
HRAS	ENST00000451590	THYM
HRAS	ENST00000451590	VV
HSP90AA1	ENST00000334701	BRCA
HSP90AA1	ENST00000334701	THCA
HSP90AB1	ENST00000371554	CM
HSPG2	ENST00000374695	BLCA
HSPG2	ENST00000374695	COREAD
HSPG2	ENST00000374695	OS
HTRA2	ENST00000258080	BC
ID3	ENST00000374561	DLBCL
IDH1	ENST00000415913	AML
IDH1	ENST00000415913	CH
IDH1	ENST00000415913	CM
IDH1	ENST00000415913	GBM
IDH1	ENST00000415913	HC
IDH1	ENST00000415913	HGG
IDH1	ENST00000415913	LGG
IDH1	ENST00000415913	MBL
IDH1	ENST00000415913	MM
IDH1	ENST00000415913	NSCLC
IDH1	ENST00000415913	OS
IDH1	ENST00000415913	PIA
IDH1	ENST00000415913	PRAD
IDH2	ENST00000330062	AML
IDH2	ENST00000330062	BLCA
IDH2	ENST00000330062	CH
IDH2	ENST00000330062	LGG
IDH2	ENST00000330062	OS
IFNAR1	ENST00000270139	MM
IFNGR1	ENST00000367739	CESC
IKBKB	ENST00000520810	MM
IKZF1	ENST00000644005	ALL
IKZF1	ENST00000644005	AML
IKZF1	ENST00000644005	AN
IKZF1	ENST00000644005	CM
IKZF3	ENST00000346872	CLL
IL6ST	ENST00000381298	HC
IL7R	ENST00000303115	ALL
IL7R	ENST00000303115	ESCA
IL7R	ENST00000303115	HC
ING1	ENST00000375774	UCEC
INO80	ENST00000361937	DLBCL
IRAK1	ENST00000369980	MM
IRF1	ENST00000245414	MM
IRF4	ENST00000380956	CLL
IRF4	ENST00000380956	DLBCL
IRF4	ENST00000380956	MM
IRF4	ENST00000380956	NHLY
IRS4	ENST00000372129	BLCA
IRS4	ENST00000372129	PAAD
JAK1	ENST00000342505	OV
JAK1	ENST00000342505	PRAD
JAK1	ENST00000342505	UCEC
JAK2	ENST00000381652	ALL
JAK2	ENST00000381652	AML
JAK2	ENST00000381652	BRCA
JAK3	ENST00000458235	ALL
KAT6A	ENST00000396930	ESCA
KAT6A	ENST00000396930	PRAD
KAT6A	ENST00000396930	RPC
KAT6B	ENST00000287239	BRCA
KAT6B	ENST00000287239	MBL
KAT6B	ENST00000287239	PRAD
KDM3B	ENST00000314358	MBL
KDM3B	ENST00000314358	PIA
KDM5A	ENST00000399788	CM
KDM5C	ENST00000375401	HNSC
KDM5C	ENST00000375401	MM
KDM5C	ENST00000375401	RCCC
KDM6A	ENST00000377967	ALL
KDM6A	ENST00000377967	BLCA
KDM6A	ENST00000377967	BRCA
KDM6A	ENST00000377967	CH
KDM6A	ENST00000377967	ESCA
KDM6A	ENST00000377967	HNSC
KDM6A	ENST00000377967	LUSC
KDM6A	ENST00000377967	MBL
KDM6A	ENST00000377967	PAAD
KDM6A	ENST00000377967	PIA
KDM6A	ENST00000377967	PRAD
KDM6A	ENST00000377967	RPC
KDM6A	ENST00000377967	SCLC
KDM6A	ENST00000377967	SSCC
KDM6A	ENST00000377967	ST
KDR	ENST00000645273	ANGS
KDR	ENST00000645273	CLL
KDR	ENST00000645273	DLBCL
KDR	ENST00000645273	LUAD
KDR	ENST00000645273	PAIS
KDR	ENST00000645273	SBCC
KDR	ENST00000645273	SSCC
KEAP1	ENST00000171111	CH
KEAP1	ENST00000171111	HC
KEAP1	ENST00000171111	LUAD
KEAP1	ENST00000171111	LUSC
KEAP1	ENST00000171111	NSCLC
KEAP1	ENST00000171111	RCCC
KEL	ENST00000355265	LGG
KIF5B	ENST00000302418	HNSC
KIFC1	ENST00000428849	UCEC
KIT	ENST00000288135	AML
KIT	ENST00000288135	CM
KIT	ENST00000288135	LGG
KIT	ENST00000288135	MGCT
KIT	ENST00000288135	OS
KIT	ENST00000288135	ST
KLF4	ENST00000374672	ALL
KLF4	ENST00000374672	BRCA
KLF4	ENST00000374672	NSCLC
KLF5	ENST00000377687	BLCA
KLF5	ENST00000377687	CESC
KLF5	ENST00000377687	LUSC
KLHL36	ENST00000564996	MM
KLHL6	ENST00000341319	NHLY
KMT2A	ENST00000534358	ACC
KMT2A	ENST00000534358	BCNET
KMT2A	ENST00000534358	BLCA
KMT2A	ENST00000534358	CM
KMT2A	ENST00000534358	ESCA
KMT2A	ENST00000534358	HC
KMT2A	ENST00000534358	OV
KMT2A	ENST00000534358	PRAD
KMT2A	ENST00000534358	SBCC
KMT2A	ENST00000534358	THCA
KMT2B	ENST00000420124	OS
KMT2B	ENST00000420124	VV
KMT2C	ENST00000262189	ACY
KMT2C	ENST00000262189	AML
KMT2C	ENST00000262189	AN
KMT2C	ENST00000262189	BLCA
KMT2C	ENST00000262189	BRCA
KMT2C	ENST00000262189	CESC
KMT2C	ENST00000262189	CH
KMT2C	ENST00000262189	CM
KMT2C	ENST00000262189	COREAD
KMT2C	ENST00000262189	ESCA
KMT2C	ENST00000262189	EWS
KMT2C	ENST00000262189	HC
KMT2C	ENST00000262189	HNSC
KMT2C	ENST00000262189	LUAD
KMT2C	ENST00000262189	LUSC
KMT2C	ENST00000262189	MBL
KMT2C	ENST00000262189	NSPH
KMT2C	ENST00000262189	OV
KMT2C	ENST00000262189	PAAD
KMT2C	ENST00000262189	PAIS
KMT2C	ENST00000262189	PCPG
KMT2C	ENST00000262189	PIA
KMT2C	ENST00000262189	PRAD
KMT2C	ENST00000262189	RCCC
KMT2C	ENST00000262189	RPC
KMT2C	ENST00000262189	SCLC
KMT2C	ENST00000262189	SG
KMT2C	ENST00000262189	SSCC
KMT2C	ENST00000262189	ST
KMT2C	ENST00000262189	THCA
KMT2C	ENST00000262189	UCEC
KMT2C	ENST00000262189	VV
KMT2D	ENST00000301067	ACY
KMT2D	ENST00000301067	ALL
KMT2D	ENST00000301067	AN
KMT2D	ENST00000301067	BLCA
KMT2D	ENST00000301067	BRCA
KMT2D	ENST00000301067	CESC
KMT2D	ENST00000301067	CH
KMT2D	ENST00000301067	CLL
KMT2D	ENST00000301067	DLBCL
KMT2D	ENST00000301067	ESCA
KMT2D	ENST00000301067	GBM
KMT2D	ENST00000301067	HC
KMT2D	ENST00000301067	HGG
KMT2D	ENST00000301067	HNSC
KMT2D	ENST00000301067	LUSC
KMT2D	ENST00000301067	LY
KMT2D	ENST00000301067	MBL
KMT2D	ENST00000301067	MESO
KMT2D	ENST00000301067	NB
KMT2D	ENST00000301067	NHLY
KMT2D	ENST00000301067	NSCLC
KMT2D	ENST00000301067	OV
KMT2D	ENST00000301067	PAAD
KMT2D	ENST00000301067	PIA
KMT2D	ENST00000301067	PRAD
KMT2D	ENST00000301067	RCH
KMT2D	ENST00000301067	SBCC
KMT2D	ENST00000301067	SCLC
KMT2D	ENST00000301067	SSCC
KMT2D	ENST00000301067	ST
KMT2D	ENST00000301067	UCEC
KRAS	ENST00000256078	ALL
KRAS	ENST00000256078	AML
KRAS	ENST00000256078	AN
KRAS	ENST00000256078	BC
KRAS	ENST00000256078	BCNET
KRAS	ENST00000256078	BLCA
KRAS	ENST00000256078	BRCA
KRAS	ENST00000256078	CESC
KRAS	ENST00000256078	CH
KRAS	ENST00000256078	CLL
KRAS	ENST00000256078	CM
KRAS	ENST00000256078	COREAD
KRAS	ENST00000256078	DLBCL
KRAS	ENST00000256078	ESCA
KRAS	ENST00000256078	HC
KRAS	ENST00000256078	LUAD
KRAS	ENST00000256078	MGCT
KRAS	ENST00000256078	MM
KRAS	ENST00000256078	NSCLC
KRAS	ENST00000256078	OV
KRAS	ENST00000256078	PAAD
KRAS	ENST00000256078	PAIS
KRAS	ENST00000256078	PIA
KRAS	ENST00000256078	PRAD
KRAS	ENST00000256078	RPC
KRAS	ENST00000256078	ST
KRAS	ENST00000256078	THCA
KRAS	ENST00000256078	UCEC
KRAS	ENST00000256078	UCS
LATS1	ENST00000543571	CESC
LATS1	ENST00000543571	COREAD
LATS1	ENST00000543571	OV
LATS1	ENST00000543571	PAAD
LATS1	ENST00000543571	SBCC
LATS2	ENST00000382592	LUSC
LATS2	ENST00000382592	MESO
LATS2	ENST00000382592	VV
LDB1	ENST00000425280	MBL
LDB1	ENST00000425280	PIA
LIFR	ENST00000263409	SCLC
LOX	ENST00000231004	BC
LPAR4	ENST00000435339	HNSC
LPP	ENST00000640853	HNSC
LPP	ENST00000640853	UCS
LRIG3	ENST00000320743	BLCA
LRIG3	ENST00000320743	DLBCL
LRIG3	ENST00000320743	LUAD
LRP1B	ENST00000389484	AML
LRP1B	ENST00000389484	AN
LRP1B	ENST00000389484	BRCA
LRP1B	ENST00000389484	CH
LRP1B	ENST00000389484	CLL
LRP1B	ENST00000389484	CM
LRP1B	ENST00000389484	COREAD
LRP1B	ENST00000389484	ESCA
LRP1B	ENST00000389484	GBM
LRP1B	ENST00000389484	HC
LRP1B	ENST00000389484	HNSC
LRP1B	ENST00000389484	LUAD
LRP1B	ENST00000389484	LUSC
LRP1B	ENST00000389484	MBL
LRP1B	ENST00000389484	MGCT
LRP1B	ENST00000389484	MM
LRP1B	ENST00000389484	NB
LRP1B	ENST00000389484	NSCLC
LRP1B	ENST00000389484	OS
LRP1B	ENST00000389484	OV
LRP1B	ENST00000389484	PAAD
LRP1B	ENST00000389484	PRAD
LRP1B	ENST00000389484	RCCC
LRP1B	ENST00000389484	RHBDS
LRP1B	ENST00000389484	SBCC
LRP1B	ENST00000389484	SCLC
LRP1B	ENST00000389484	ST
LRP1B	ENST00000389484	THCA
LRP1B	ENST00000389484	UCS
LRP1B	ENST00000389484	UVM
LTB	ENST00000429299	LY
LY75-CD302	ENST00000504764	AML
LZTR1	ENST00000215739	ALL
LZTR1	ENST00000215739	GBM
LZTR1	ENST00000215739	PAAD
LZTR1	ENST00000215739	PRAD
LZTR1	ENST00000215739	UCEC
MAF	ENST00000326043	MM
MALT1	ENST00000348428	DLBCL
MAML2	ENST00000524717	AML
MAML2	ENST00000524717	LUSC
MAP2	ENST00000360351	LY
MAP2K1	ENST00000307102	BLCA
MAP2K1	ENST00000307102	CM
MAP2K1	ENST00000307102	COREAD
MAP2K1	ENST00000307102	DLBCL
MAP2K1	ENST00000307102	LUAD
MAP2K1	ENST00000307102	NSCLC
MAP2K4	ENST00000415385	BRCA
MAP2K4	ENST00000415385	CH
MAP2K4	ENST00000415385	COREAD
MAP2K4	ENST00000415385	PAAD
MAP2K7	ENST00000397983	ST
MAP3K1	ENST00000399503	BRCA
MAP3K1	ENST00000399503	CESC
MAP3K1	ENST00000399503	COREAD
MAP3K1	ENST00000399503	GBM
MAP3K1	ENST00000399503	HC
MAP3K1	ENST00000399503	THCA
MAP3K1	ENST00000399503	UCEC
MAPK1	ENST00000215832	CESC
MAPK1	ENST00000215832	CLL
MAPK1	ENST00000215832	HC
MAPK1	ENST00000215832	HNSC
MARK2	ENST00000402010	PAAD
MAX	ENST00000358664	BRCA
MAX	ENST00000358664	LGG
MAX	ENST00000358664	MBL
MAX	ENST00000358664	MM
MAX	ENST00000358664	PIA
MAX	ENST00000358664	RCCC
MAX	ENST00000358664	UCEC
MB21D2	ENST00000392452	HNSC
MB21D2	ENST00000392452	LUAD
MB21D2	ENST00000392452	LUSC
MCM3AP	ENST00000397708	HNSC
MDM2	ENST00000258149	LEIS
MDM4	ENST00000367182	BRCA
MECOM	ENST00000264674	BLCA
MECOM	ENST00000264674	CM
MECOM	ENST00000264674	DLBCL
MECOM	ENST00000264674	PRAD
MECOM	ENST00000264674	SBCC
MECOM	ENST00000264674	UCEC
MED12	ENST00000374080	CESC
MED12	ENST00000374080	CLL
MED12	ENST00000374080	GBM
MED12	ENST00000374080	LGG
MED12	ENST00000374080	NB
MED12	ENST00000374080	OS
MED12	ENST00000374080	PRAD
MEF2B	ENST00000424583	DLBCL
MEF2B	ENST00000424583	NHLY
MEN1	ENST00000337652	ACC
MEN1	ENST00000337652	BRCA
MEN1	ENST00000337652	HC
MEN1	ENST00000337652	LNET
MEN1	ENST00000337652	PAIS
MET	ENST00000318493	LGG
MET	ENST00000318493	RCCC
MET	ENST00000318493	RPC
MGA	ENST00000219905	CLL
MGA	ENST00000219905	LUAD
MLLT1	ENST00000252674	WT
MLLT3	ENST00000380338	CM
MSI2	ENST00000284073	NB
MSN	ENST00000360270	ESCA
MSN	ENST00000360270	SBCC
MTCP1	ENST00000369476	COREAD
MTOR	ENST00000361445	AML
MTOR	ENST00000361445	ANGS
MTOR	ENST00000361445	BRCA
MTOR	ENST00000361445	COREAD
MTOR	ENST00000361445	HC
MTOR	ENST00000361445	LGG
MTOR	ENST00000361445	OS
MTOR	ENST00000361445	PAIS
MTOR	ENST00000361445	RCCC
MTOR	ENST00000361445	RCH
MTOR	ENST00000361445	UCEC
MYC	ENST00000621592	AML
MYC	ENST00000621592	BLY
MYC	ENST00000621592	LY
MYC	ENST00000621592	NHLY
MYCN	ENST00000281043	GBM
MYCN	ENST00000281043	MBL
MYCN	ENST00000281043	NB
MYCN	ENST00000281043	PIA
MYCN	ENST00000281043	SBCC
MYCN	ENST00000281043	UCEC
MYD88	ENST00000417037	CLL
MYD88	ENST00000417037	DLBCL
MYD88	ENST00000417037	NHLY
MYH11	ENST00000396324	AML
MYH11	ENST00000396324	BRCA
MYH11	ENST00000396324	LGG
MYH11	ENST00000396324	NSPH
MYH11	ENST00000396324	PRAD
MYH11	ENST00000396324	SBCC
MYH9	ENST00000216181	BRCA
MYH9	ENST00000216181	COREAD
MYH9	ENST00000216181	ESCA
MYH9	ENST00000216181	HNSC
MYH9	ENST00000216181	OV
MYH9	ENST00000216181	SBCC
MYH9	ENST00000216181	ST
MYO5A	ENST00000399231	BRCA
MYO5A	ENST00000399231	NB
NBEA	ENST00000400445	BC
NBEA	ENST00000400445	CM
NBEA	ENST00000400445	COREAD
NBEA	ENST00000400445	DLBCL
NBEA	ENST00000400445	ESCA
NBEA	ENST00000400445	HC
NBEA	ENST00000400445	PAAD
NCOA1	ENST00000406961	BRCA
NCOA2	ENST00000452400	LUAD
NCOA2	ENST00000452400	LUSC
NCOR1	ENST00000268712	BLCA
NCOR1	ENST00000268712	BRCA
NCOR1	ENST00000268712	CH
NCOR1	ENST00000268712	DLBCL
NCOR1	ENST00000268712	HNSC
NCOR1	ENST00000268712	MBL
NCOR1	ENST00000268712	MESO
NCOR1	ENST00000268712	PRAD
NCOR1	ENST00000268712	SCLC
NCOR2	ENST00000405201	BRCA
NCOR2	ENST00000405201	COREAD
NCOR2	ENST00000405201	ESCA
NCOR2	ENST00000405201	HC
NCOR2	ENST00000405201	PRAD
NEFH	ENST00000310624	THCA
NF1	ENST00000358273	ACC
NF1	ENST00000358273	ALL
NF1	ENST00000358273	AML
NF1	ENST00000358273	BLCA
NF1	ENST00000358273	BRCA
NF1	ENST00000358273	CH
NF1	ENST00000358273	CM
NF1	ENST00000358273	COREAD
NF1	ENST00000358273	GBM
NF1	ENST00000358273	HC
NF1	ENST00000358273	HNSC
NF1	ENST00000358273	LGG
NF1	ENST00000358273	LUAD
NF1	ENST00000358273	LUSC
NF1	ENST00000358273	NB
NF1	ENST00000358273	NSCLC
NF1	ENST00000358273	OV
NF1	ENST00000358273	PCPG
NF1	ENST00000358273	PIA
NF1	ENST00000358273	RCCC
NF1	ENST00000358273	RHBDS
NF1	ENST00000358273	S
NF1	ENST00000358273	THCA
NF2	ENST00000338641	CESC
NF2	ENST00000338641	HC
NF2	ENST00000338641	HNSC
NF2	ENST00000338641	MESO
NF2	ENST00000338641	OV
NF2	ENST00000338641	PAAD
NF2	ENST00000338641	RCCC
NF2	ENST00000338641	RPC
NF2	ENST00000338641	SSCC
NFATC2	ENST00000396009	OS
NFATC2	ENST00000396009	PAAD
NFE2L2	ENST00000397062	BLCA
NFE2L2	ENST00000397062	CESC
NFE2L2	ENST00000397062	ESCA
NFE2L2	ENST00000397062	HC
NFE2L2	ENST00000397062	HNSC
NFE2L2	ENST00000397062	LUSC
NFE2L2	ENST00000397062	RPC
NFE2L2	ENST00000397062	UCEC
NFKB2	ENST00000369966	DLBCL
NFKB2	ENST00000369966	MM
NFKBIA	ENST00000216797	DLBCL
NFKBIA	ENST00000216797	MM
NFKBIE	ENST00000275015	CLL
NFKBIE	ENST00000275015	CM
NFKBIE	ENST00000275015	DLBCL
NFKBIE	ENST00000275015	NHLY
NIN	ENST00000382041	BRCA
NIN	ENST00000382041	COREAD
NIN	ENST00000382041	MESO
NIN	ENST00000382041	ST
NIPBL	ENST00000282516	ESCA
NIPBL	ENST00000282516	LGG
NKTR	ENST00000232978	AML
NKX2-1	ENST00000354822	LGG
NONO	ENST00000276079	BRCA
NONO	ENST00000276079	CM
NOTCH1	ENST00000277541	ALL
NOTCH1	ENST00000277541	CESC
NOTCH1	ENST00000277541	CLL
NOTCH1	ENST00000277541	DLBCL
NOTCH1	ENST00000277541	ESCA
NOTCH1	ENST00000277541	HNSC
NOTCH1	ENST00000277541	LGG
NOTCH1	ENST00000277541	LUSC
NOTCH1	ENST00000277541	MBL
NOTCH1	ENST00000277541	MGCT
NOTCH1	ENST00000277541	NSCLC
NOTCH1	ENST00000277541	OV
NOTCH1	ENST00000277541	SBCC
NOTCH1	ENST00000277541	SCLC
NOTCH1	ENST00000277541	SG
NOTCH1	ENST00000277541	SSCC
NOTCH1	ENST00000277541	UCEC
NOTCH1	ENST00000277541	VV
NOTCH2	ENST00000256646	ACY
NOTCH2	ENST00000256646	BLCA
NOTCH2	ENST00000256646	BRCA
NOTCH2	ENST00000256646	DLBCL
NOTCH2	ENST00000256646	ESCA
NOTCH2	ENST00000256646	HNSC
NOTCH2	ENST00000256646	NHLY
NOTCH2	ENST00000256646	PRAD
NOTCH2	ENST00000256646	SBCC
NOTCH2	ENST00000256646	SSCC
NPEPPS	ENST00000322157	AML
NPEPPS	ENST00000322157	LUSC
NPM1	ENST00000296930	AML
NPRL2	ENST00000232501	PAIS
NRAS	ENST00000369535	ALL
NRAS	ENST00000369535	AML
NRAS	ENST00000369535	ANGS
NRAS	ENST00000369535	CH
NRAS	ENST00000369535	CLL
NRAS	ENST00000369535	CM
NRAS	ENST00000369535	COREAD
NRAS	ENST00000369535	GBM
NRAS	ENST00000369535	HC
NRAS	ENST00000369535	LGG
NRAS	ENST00000369535	LUAD
NRAS	ENST00000369535	LUSC
NRAS	ENST00000369535	MGCT
NRAS	ENST00000369535	MM
NRAS	ENST00000369535	NSPH
NRAS	ENST00000369535	OV
NRAS	ENST00000369535	PAAD
NRAS	ENST00000369535	PRAD
NRAS	ENST00000369535	THCA
NRAS	ENST00000369535	THYM
NRAS	ENST00000369535	UCEC
NRG1	ENST00000287842	ST
NRK	ENST00000243300	LUSC
NRP1	ENST00000265371	AML
NSD1	ENST00000439151	CESC
NSD1	ENST00000439151	ESCA
NSD1	ENST00000439151	HNSC
NSD1	ENST00000439151	LUSC
NSD1	ENST00000439151	ST
NSD1	ENST00000439151	UCEC
NSD1	ENST00000439151	UCS
NSD2	ENST00000382895	ALL
NT5C3A	ENST00000620705	AML
NTRK1	ENST00000524377	BRCA
NTRK3	ENST00000360948	ESCA
NTRK3	ENST00000360948	ST
NUMA1	ENST00000393695	BRCA
NUP214	ENST00000359428	BCNET
NUP214	ENST00000359428	MM
NUP214	ENST00000359428	RPC
NXF1	ENST00000532297	CLL
P2RY8	ENST00000381297	BLY
P2RY8	ENST00000381297	DLBCL
P2RY8	ENST00000381297	NHLY
PABPC1	ENST00000318607	DLBCL
PABPC1	ENST00000318607	LUSC
PABPC1	ENST00000318607	MM
PABPC1	ENST00000318607	THCA
PAK2	ENST00000327134	THCA
PARP4	ENST00000381989	COREAD
PARP4	ENST00000381989	MM
PBRM1	ENST00000394830	CESC
PBRM1	ENST00000394830	CH
PBRM1	ENST00000394830	CM
PBRM1	ENST00000394830	ESCA
PBRM1	ENST00000394830	LUAD
PBRM1	ENST00000394830	RCCC
PBRM1	ENST00000394830	RPC
PBRM1	ENST00000394830	UCEC
PCBP1	ENST00000303577	COREAD
PCBP1	ENST00000303577	PAAD
PCDH17	ENST00000377918	CH
PCMTD1	ENST00000360540	AML
PDCD1LG2	ENST00000397747	CM
PDE4DIP	ENST00000369356	THCA
PDGFRA	ENST00000257290	GBM
PDGFRA	ENST00000257290	HGG
PDGFRA	ENST00000257290	LGG
PDGFRA	ENST00000257290	LUSC
PDGFRA	ENST00000257290	PIA
PDGFRB	ENST00000261799	BRCA
PDGFRB	ENST00000261799	UCS
PDPR	ENST00000288050	THCA
PEG3	ENST00000326441	PAAD
PHF6	ENST00000332070	ALL
PHF6	ENST00000332070	AML
PIK3CA	ENST00000263967	ACY
PIK3CA	ENST00000263967	AN
PIK3CA	ENST00000263967	ANGS
PIK3CA	ENST00000263967	BLCA
PIK3CA	ENST00000263967	BRCA
PIK3CA	ENST00000263967	CESC
PIK3CA	ENST00000263967	CH
PIK3CA	ENST00000263967	CM
PIK3CA	ENST00000263967	COREAD
PIK3CA	ENST00000263967	EPD
PIK3CA	ENST00000263967	ESCA
PIK3CA	ENST00000263967	GBM
PIK3CA	ENST00000263967	HC
PIK3CA	ENST00000263967	HGG
PIK3CA	ENST00000263967	HNSC
PIK3CA	ENST00000263967	LEIS
PIK3CA	ENST00000263967	LGG
PIK3CA	ENST00000263967	LUAD
PIK3CA	ENST00000263967	LUSC
PIK3CA	ENST00000263967	MBL
PIK3CA	ENST00000263967	MESO
PIK3CA	ENST00000263967	MGCT
PIK3CA	ENST00000263967	NSCLC
PIK3CA	ENST00000263967	OS
PIK3CA	ENST00000263967	OV
PIK3CA	ENST00000263967	PAAD
PIK3CA	ENST00000263967	PIA
PIK3CA	ENST00000263967	PRAD
PIK3CA	ENST00000263967	RCCC
PIK3CA	ENST00000263967	RPC
PIK3CA	ENST00000263967	S
PIK3CA	ENST00000263967	SBCC
PIK3CA	ENST00000263967	ST
PIK3CA	ENST00000263967	UCEC
PIK3CA	ENST00000263967	UCS
PIK3CA	ENST00000263967	VV
PIK3CB	ENST00000289153	BLCA
PIK3CB	ENST00000289153	GBM
PIK3CB	ENST00000289153	PRAD
PIK3R1	ENST00000521381	ACY
PIK3R1	ENST00000521381	BRCA
PIK3R1	ENST00000521381	CH
PIK3R1	ENST00000521381	GBM
PIK3R1	ENST00000521381	HNSC
PIK3R1	ENST00000521381	LGG
PIK3R1	ENST00000521381	OS
PIK3R1	ENST00000521381	ST
PIK3R1	ENST00000521381	UCEC
PIK3R1	ENST00000521381	UCS
PIM1	ENST00000373509	DLBCL
PIM1	ENST00000373509	LY
PIM1	ENST00000373509	MM
PIM1	ENST00000373509	NHLY
PLAG1	ENST00000316981	BRCA
PLCB4	ENST00000378501	UVM
PLCG1	ENST00000244007	ANGS
PLCG1	ENST00000244007	BC
PLCG1	ENST00000244007	LGG
PML	ENST00000268058	VV
PMS2	ENST00000265849	PRAD
POLD1	ENST00000613923	BRCA
POLE	ENST00000320574	CESC
POLE	ENST00000320574	SBCC
POLE	ENST00000320574	UCEC
POLQ	ENST00000264233	CESC
POLQ	ENST00000264233	CM
POLQ	ENST00000264233	LUSC
POLQ	ENST00000264233	SSCC
POLQ	ENST00000264233	UCEC
POT1	ENST00000357628	CLL
POT1	ENST00000357628	CM
POT1	ENST00000357628	HC
POT1	ENST00000357628	LGG
POT1	ENST00000357628	UCEC
POU2F2	ENST00000526816	DLBCL
POU2F2	ENST00000526816	NHLY
PPM1D	ENST00000305921	HGG
PPM1D	ENST00000305921	PIA
PPM1D	ENST00000305921	SBCC
PPP2R1A	ENST00000322088	ACY
PPP2R1A	ENST00000322088	COREAD
PPP2R1A	ENST00000322088	OV
PPP2R1A	ENST00000322088	THCA
PPP2R1A	ENST00000322088	UCEC
PPP2R1A	ENST00000322088	UCS
PPP2R1A	ENST00000322088	UVM
PPP3CA	ENST00000394854	ST
PPP6C	ENST00000451402	CM
PPP6C	ENST00000451402	SBCC
PPT2	ENST00000361568	BLCA
PRDM1	ENST00000369096	DLBCL
PRDM1	ENST00000369096	MM
PRDM1	ENST00000369096	NHLY
PRDM1	ENST00000369096	PRAD
PRDM2	ENST00000235372	AN
PRDM2	ENST00000235372	HC
PRDM2	ENST00000235372	RPC
PREX2	ENST00000288368	BLCA
PREX2	ENST00000288368	BRCA
PREX2	ENST00000288368	CM
PREX2	ENST00000288368	DLBCL
PREX2	ENST00000288368	ESCA
PREX2	ENST00000288368	PRAD
PRF1	ENST00000441259	NSCLC
PRF1	ENST00000441259	ST
PRKAR1A	ENST00000392711	ACC
PRKAR1A	ENST00000392711	MBL
PRKAR1A	ENST00000392711	PIA
PRKCB	ENST00000643927	CM
PRKCB	ENST00000643927	DLBCL
PRKCB	ENST00000643927	HNSC
PRKCB	ENST00000643927	LUSC
PRKCB	ENST00000643927	ST
PRKCD	ENST00000394729	DLBCL
PRKCD	ENST00000394729	NHLY
PRKD2	ENST00000433867	MM
PRR14	ENST00000542965	THCA
PRRX1	ENST00000239461	ST
PSIP1	ENST00000380733	BLCA
PTCH1	ENST00000331920	ESCA
PTCH1	ENST00000331920	MBL
PTCH1	ENST00000331920	MESO
PTCH1	ENST00000331920	OS
PTCH1	ENST00000331920	PIA
PTCH1	ENST00000331920	SBCC
PTEN	ENST00000371953	BLCA
PTEN	ENST00000371953	BRCA
PTEN	ENST00000371953	CESC
PTEN	ENST00000371953	CH
PTEN	ENST00000371953	CM
PTEN	ENST00000371953	COREAD
PTEN	ENST00000371953	ESCA
PTEN	ENST00000371953	GBM
PTEN	ENST00000371953	HC
PTEN	ENST00000371953	HGG
PTEN	ENST00000371953	HNSC
PTEN	ENST00000371953	LGG
PTEN	ENST00000371953	LUSC
PTEN	ENST00000371953	MBL
PTEN	ENST00000371953	NSCLC
PTEN	ENST00000371953	OS
PTEN	ENST00000371953	OV
PTEN	ENST00000371953	PAIS
PTEN	ENST00000371953	PIA
PTEN	ENST00000371953	PRAD
PTEN	ENST00000371953	RCCC
PTEN	ENST00000371953	RCH
PTEN	ENST00000371953	RPC
PTEN	ENST00000371953	S
PTEN	ENST00000371953	ST
PTEN	ENST00000371953	THCA
PTEN	ENST00000371953	UCEC
PTEN	ENST00000371953	UCS
PTMA	ENST00000341369	MGCT
PTPN11	ENST00000635625	ALL
PTPN11	ENST00000635625	AML
PTPN11	ENST00000635625	CLL
PTPN11	ENST00000635625	COREAD
PTPN11	ENST00000635625	GBM
PTPN11	ENST00000635625	LGG
PTPN11	ENST00000635625	MM
PTPN11	ENST00000635625	NB
PTPN11	ENST00000635625	PIA
PTPN13	ENST00000436978	BRCA
PTPN14	ENST00000366956	SBCC
PTPN6	ENST00000456013	CM
PTPN6	ENST00000456013	DLBCL
PTPRB	ENST00000334414	ANGS
PTPRB	ENST00000334414	CM
PTPRB	ENST00000334414	OV
PTPRC	ENST00000442510	AN
PTPRC	ENST00000442510	CM
PTPRC	ENST00000442510	COREAD
PTPRD	ENST00000381196	BCNET
PTPRD	ENST00000381196	BRCA
PTPRD	ENST00000381196	CM
PTPRD	ENST00000381196	DLBCL
PTPRD	ENST00000381196	ESCA
PTPRD	ENST00000381196	NSCLC
PTPRD	ENST00000381196	PRAD
PTPRD	ENST00000381196	VV
PTPRK	ENST00000532331	NSCLC
PTPRK	ENST00000532331	SCLC
PTPRT	ENST00000373198	ESCA
PTPRT	ENST00000373198	HNSC
PTPRT	ENST00000373198	OV
QKI	ENST00000361752	CM
RABEP1	ENST00000537505	SSCC
RAC1	ENST00000356142	CM
RAC1	ENST00000356142	HNSC
RAD21	ENST00000297338	AML
RAD21	ENST00000297338	LUSC
RAF1	ENST00000251849	BLCA
RAF1	ENST00000251849	CM
RALGDS	ENST00000372050	SSCC
RANBP2	ENST00000283195	HC
RANBP2	ENST00000283195	NB
RANBP2	ENST00000283195	NSPH
RANBP2	ENST00000283195	PCPG
RANBP2	ENST00000283195	PRAD
RANBP2	ENST00000283195	RCCC
RAP1GDS1	ENST00000339360	ESCA
RAP1GDS1	ENST00000339360	RCCC
RARA	ENST00000254066	BC
RASA1	ENST00000274376	HNSC
RASA1	ENST00000274376	LUSC
RASA2	ENST00000286364	DLBCL
RB1	ENST00000267163	ACC
RB1	ENST00000267163	BLCA
RB1	ENST00000267163	BRCA
RB1	ENST00000267163	CESC
RB1	ENST00000267163	CM
RB1	ENST00000267163	ESCA
RB1	ENST00000267163	GBM
RB1	ENST00000267163	HC
RB1	ENST00000267163	HNSC
RB1	ENST00000267163	LEIS
RB1	ENST00000267163	LUAD
RB1	ENST00000267163	LUSC
RB1	ENST00000267163	MM
RB1	ENST00000267163	NSCLC
RB1	ENST00000267163	OS
RB1	ENST00000267163	OV
RB1	ENST00000267163	PIA
RB1	ENST00000267163	PRAD
RB1	ENST00000267163	RB
RB1	ENST00000267163	S
RB1	ENST00000267163	SCLC
RB1	ENST00000267163	ST
RB1	ENST00000267163	UCEC
RB1	ENST00000267163	UCS
RBFOX1	ENST00000422070	PRAD
RBFOX2	ENST00000438146	THCA
RBM10	ENST00000329236	BLCA
RBM10	ENST00000329236	CH
RBM10	ENST00000329236	COREAD
RBM10	ENST00000329236	LUAD
RBM10	ENST00000329236	NSCLC
RBM10	ENST00000329236	PAAD
RBM15	ENST00000369784	HNSC
RBM38	ENST00000356208	DLBCL
RBM39	ENST00000253363	UCEC
RECQL4	ENST00000617875	ST
RELA	ENST00000406246	ST
RET	ENST00000355710	CM
RET	ENST00000355710	LUAD
RET	ENST00000355710	PCPG
RET	ENST00000355710	S
RET	ENST00000355710	THCA
RGL3	ENST00000393423	AML
RGPD3	ENST00000409886	CM
RGPD3	ENST00000409886	THCA
RGS7	ENST00000366565	BRCA
RGS7	ENST00000366565	LUAD
RHOA	ENST00000418115	BLCA
RHOA	ENST00000418115	BLY
RHOA	ENST00000418115	DLBCL
RHOA	ENST00000418115	HNSC
RHOA	ENST00000418115	LY
RHOA	ENST00000418115	NHLY
RHOA	ENST00000418115	PRAD
RHOA	ENST00000418115	ST
RHPN2	ENST00000254260	BRCA
RHPN2	ENST00000254260	LUSC
RHPN2	ENST00000254260	THCA
RIPK1	ENST00000259808	CLL
RNF213	ENST00000582970	BLCA
RNF213	ENST00000582970	ESCA
RNF213	ENST00000582970	LUSC
RNF213	ENST00000582970	MBL
RNF213	ENST00000582970	PRAD
RNF213	ENST00000582970	SBCC
RNF213	ENST00000582970	UCEC
RNF43	ENST00000584437	ALL
RNF43	ENST00000584437	CH
RNF43	ENST00000584437	COREAD
RNF43	ENST00000584437	ESCA
RNF43	ENST00000584437	PAAD
RNF43	ENST00000584437	PRAD
RNF43	ENST00000584437	ST
RNF43	ENST00000584437	UCEC
RNF6	ENST00000381588	COREAD
RPL10	ENST00000424325	MM
RPL10	ENST00000424325	NHLY
RPL22	ENST00000234875	HC
RPS3A	ENST00000274065	MM
RPS6KA3	ENST00000645845	HC
RRAGC	ENST00000373001	NHLY
RRAS2	ENST00000256196	UCEC
RSPH10B2	ENST00000403107	LGG
RUNX1	ENST00000300305	ACY
RUNX1	ENST00000300305	ALL
RUNX1	ENST00000300305	AML
RUNX1	ENST00000300305	BRCA
RUNX1T1	ENST00000436581	HC
RUNX1T1	ENST00000436581	LGG
RUNX1T1	ENST00000436581	PRAD
RUNX1T1	ENST00000436581	SBCC
RUNX1T1	ENST00000436581	SCLC
RXRA	ENST00000481739	BLCA
SALL4	ENST00000217086	BRCA
SALL4	ENST00000217086	CLL
SALL4	ENST00000217086	LUSC
SATB1	ENST00000417717	BC
SDC4	ENST00000372733	ST
SEPT9	ENST00000427177	MM
SET	ENST00000372692	SCLC
SETBP1	ENST00000282030	ACC
SETBP1	ENST00000282030	PCPG
SETBP1	ENST00000282030	RCCC
SETBP1	ENST00000282030	THCA
SETD1B	ENST00000604567	ESCA
SETD1B	ENST00000604567	OV
SETD1B	ENST00000604567	PAAD
SETD2	ENST00000409792	ALL
SETD2	ENST00000409792	BLCA
SETD2	ENST00000409792	CLL
SETD2	ENST00000409792	CM
SETD2	ENST00000409792	EWS
SETD2	ENST00000409792	HC
SETD2	ENST00000409792	LGG
SETD2	ENST00000409792	LUAD
SETD2	ENST00000409792	MESO
SETD2	ENST00000409792	MM
SETD2	ENST00000409792	NSCLC
SETD2	ENST00000409792	OS
SETD2	ENST00000409792	PAAD
SETD2	ENST00000409792	PAIS
SETD2	ENST00000409792	PIA
SETD2	ENST00000409792	PRAD
SETD2	ENST00000409792	RCCC
SETD2	ENST00000409792	RPC
SETDB1	ENST00000271640	CLL
SETDB1	ENST00000271640	HC
SETDB1	ENST00000271640	MESO
SF3B1	ENST00000335508	AML
SF3B1	ENST00000335508	BLCA
SF3B1	ENST00000335508	BRCA
SF3B1	ENST00000335508	CH
SF3B1	ENST00000335508	CLL
SF3B1	ENST00000335508	CM
SF3B1	ENST00000335508	LNET
SF3B1	ENST00000335508	MBL
SF3B1	ENST00000335508	PAAD
SF3B1	ENST00000335508	PRAD
SF3B1	ENST00000335508	RCCC
SF3B1	ENST00000335508	THYM
SF3B1	ENST00000335508	UVM
SFMBT2	ENST00000397167	MBL
SGK1	ENST00000367858	DLBCL
SGK1	ENST00000367858	LY
SGK1	ENST00000367858	NHLY
SH2B3	ENST00000341259	MDPS
SIN3A	ENST00000394947	NHLY
SIRPA	ENST00000622179	AML
SIRPA	ENST00000622179	CESC
SIRPA	ENST00000622179	COREAD
SIRPA	ENST00000622179	HGG
SIRPA	ENST00000622179	MBL
SIX1	ENST00000247182	WT
SLC45A3	ENST00000367145	CM
SMAD2	ENST00000262160	BRCA
SMAD2	ENST00000262160	COREAD
SMAD3	ENST00000327367	COREAD
SMAD3	ENST00000327367	PAAD
SMAD4	ENST00000342988	BRCA
SMAD4	ENST00000342988	CESC
SMAD4	ENST00000342988	CH
SMAD4	ENST00000342988	COREAD
SMAD4	ENST00000342988	ESCA
SMAD4	ENST00000342988	HNSC
SMAD4	ENST00000342988	PAAD
SMAD4	ENST00000342988	PRAD
SMAD4	ENST00000342988	ST
SMARCA1	ENST00000371121	PRAD
SMARCA4	ENST00000344626	BLCA
SMARCA4	ENST00000344626	BLY
SMARCA4	ENST00000344626	COREAD
SMARCA4	ENST00000344626	ESCA
SMARCA4	ENST00000344626	HC
SMARCA4	ENST00000344626	HNSC
SMARCA4	ENST00000344626	LGG
SMARCA4	ENST00000344626	LUAD
SMARCA4	ENST00000344626	MBL
SMARCA4	ENST00000344626	NHLY
SMARCA4	ENST00000344626	NSCLC
SMARCA4	ENST00000344626	PAAD
SMARCA4	ENST00000344626	PIA
SMARCA4	ENST00000344626	RPC
SMARCA4	ENST00000344626	THYM
SMARCB1	ENST00000344921	ATRT
SMARCB1	ENST00000344921	MBL
SMARCB1	ENST00000344921	NB
SMARCB1	ENST00000344921	PAIS
SMARCD1	ENST00000394963	BRCA
SMC1A	ENST00000322213	AML
SMO	ENST00000249373	GBM
SMO	ENST00000249373	MBL
SMO	ENST00000249373	MESO
SMO	ENST00000249373	PIA
SMO	ENST00000249373	SBCC
SOCS1	ENST00000644787	DLBCL
SOCS1	ENST00000644787	LY
SOCS1	ENST00000644787	NHLY
SOHLH2	ENST00000379881	ST
1	ENST00000426016	UCEC
SOX17	ENST00000297316	UCEC
SOX21	ENST00000376945	PRAD
SOX9	ENST00000245479	COREAD
SP140	ENST00000392045	MM
SPEN	ENST00000375759	BRCA
SPEN	ENST00000375759	CESC
SPEN	ENST00000375759	CLL
SPEN	ENST00000375759	DLBCL
SPEN	ENST00000375759	NSPH
SPEN	ENST00000375759	PAAD
SPEN	ENST00000375759	PRAD
SPEN	ENST00000375759	RCCC
SPEN	ENST00000375759	SG
SPOP	ENST00000393328	NHLY
SPOP	ENST00000393328	PRAD
SPOP	ENST00000393328	UCEC
SPOP	ENST00000393328	UCS
SRGAP3	ENST00000383836	CM
SRGAP3	ENST00000383836	MESO
SRSF2	ENST00000392485	AML
SRSF2	ENST00000392485	CESC
STAG2	ENST00000218089	AML
STAG2	ENST00000218089	BLCA
STAG2	ENST00000218089	EWS
STAG2	ENST00000218089	GBM
STAG2	ENST00000218089	LUSC
STAG2	ENST00000218089	MBL
STAG2	ENST00000218089	PIA
STAG2	ENST00000218089	RCCC
STAG2	ENST00000218089	RPC
STAG2	ENST00000218089	SBCC
STAG2	ENST00000218089	THCA
STAT3	ENST00000264657	DLBCL
STAT3	ENST00000264657	NHLY
STAT5B	ENST00000293328	OV
STAT6	ENST00000300134	DLBCL
STAT6	ENST00000300134	NHLY
STIL	ENST00000371877	CESC
STK11	ENST00000326873	CESC
STK11	ENST00000326873	CH
STK11	ENST00000326873	LUAD
STK11	ENST00000326873	NSCLC
STRN	ENST00000263918	PRAD
SUSD2	ENST00000358321	LUSC
SUZ12	ENST00000322652	AML
SUZ12	ENST00000322652	PRAD
TAF15	ENST00000605844	BLCA
TBL1XR1	ENST00000430069	ALL
TBL1XR1	ENST00000430069	DLBCL
TBX3	ENST00000257566	BRCA
TBX3	ENST00000257566	COREAD
TBX3	ENST00000257566	DLBCL
TBX3	ENST00000257566	ESCA
TCF4	ENST00000398339	MBL
TCF4	ENST00000398339	PIA
TCF7L2	ENST00000627217	COREAD
TCF7L2	ENST00000627217	UCEC
TCIRG1	ENST00000265686	CM
TEC	ENST00000381501	UCEC
TET1	ENST00000373644	GBM
TET1	ENST00000373644	HC
TET1	ENST00000373644	RPC
TET1	ENST00000373644	SBCC
TET1	ENST00000373644	ST
TET2	ENST00000540549	AML
TET2	ENST00000540549	LY
TET2	ENST00000540549	MDPS
TET2	ENST00000540549	NHLY
TET2	ENST00000540549	OS
TET2	ENST00000540549	S
TFAP4	ENST00000204517	BLY
TFAP4	ENST00000204517	NHLY
TFG	ENST00000240851	HC
TGFBR2	ENST00000359013	CESC
TGFBR2	ENST00000359013	CH
TGFBR2	ENST00000359013	COREAD
TGFBR2	ENST00000359013	ESCA
TGFBR2	ENST00000359013	HNSC
TGFBR2	ENST00000359013	PAAD
TGIF1	ENST00000330513	COREAD
TLL1	ENST00000061240	ESCA
TNC	ENST00000350763	ACC
TNC	ENST00000350763	AML
TNC	ENST00000350763	LUSC
TNC	ENST00000350763	NB
TNFAIP3	ENST00000612899	DLBCL
TNFAIP3	ENST00000612899	LY
TNFRSF14	ENST00000355716	DLBCL
TNFRSF14	ENST00000355716	LY
TNFRSF14	ENST00000355716	NHLY
1	ENST00000361337	SBCC
TOP2A	ENST00000423485	ST
TP53	ENST00000269305	ACC
TP53	ENST00000269305	ALL
TP53	ENST00000269305	AML
TP53	ENST00000269305	AN
TP53	ENST00000269305	ANGS
TP53	ENST00000269305	BC
TP53	ENST00000269305	BLCA
TP53	ENST00000269305	BLY
TP53	ENST00000269305	BRCA
TP53	ENST00000269305	CESC
TP53	ENST00000269305	CH
TP53	ENST00000269305	CLL
TP53	ENST00000269305	CM
TP53	ENST00000269305	COREAD
TP53	ENST00000269305	DLBCL
TP53	ENST00000269305	ESCA
TP53	ENST00000269305	EWS
TP53	ENST00000269305	GBM
TP53	ENST00000269305	HC
TP53	ENST00000269305	HGG
TP53	ENST00000269305	HNSC
TP53	ENST00000269305	LEIS
TP53	ENST00000269305	LGG
TP53	ENST00000269305	LUAD
TP53	ENST00000269305	LUSC
TP53	ENST00000269305	LY
TP53	ENST00000269305	MBL
TP53	ENST00000269305	MESO
TP53	ENST00000269305	MM
TP53	ENST00000269305	NHLY
TP53	ENST00000269305	NSCLC
TP53	ENST00000269305	NSPH
TP53	ENST00000269305	OS
TP53	ENST00000269305	OV
TP53	ENST00000269305	PAAD
TP53	ENST00000269305	PAIS
TP53	ENST00000269305	PIA
TP53	ENST00000269305	PRAD
TP53	ENST00000269305	RCCC
TP53	ENST00000269305	RCH
TP53	ENST00000269305	RPC
TP53	ENST00000269305	S
TP53	ENST00000269305	SBCC
TP53	ENST00000269305	SCLC
TP53	ENST00000269305	SSCC
TP53	ENST00000269305	ST
TP53	ENST00000269305	THCA
TP53	ENST00000269305	THYM
TP53	ENST00000269305	UCEC
TP53	ENST00000269305	UCS
TP53	ENST00000269305	VV
TP53	ENST00000269305	WT
TP63	ENST00000264731	BLCA
TP63	ENST00000264731	HNSC
TP63	ENST00000264731	NB
TP63	ENST00000264731	UCEC
TRAF3	ENST00000560371	MM
TRIM24	ENST00000343526	PRAD
TRIM33	ENST00000358465	MBL
TRIM49C	ENST00000448984	ST
TRIP11	ENST00000267622	BLCA
TRRAP	ENST00000359863	ACY
TRRAP	ENST00000359863	BLCA
TRRAP	ENST00000359863	CH
TRRAP	ENST00000359863	CM
TRRAP	ENST00000359863	ESCA
TRRAP	ENST00000359863	HNSC
TRRAP	ENST00000359863	LEIS
TRRAP	ENST00000359863	MM
TSC1	ENST00000298552	BLCA
TSC1	ENST00000298552	HC
TSC2	ENST00000219476	ACY
TSC2	ENST00000219476	BLCA
TSC2	ENST00000219476	HC
TSC2	ENST00000219476	PAIS
TSC2	ENST00000219476	RCH
TSC2	ENST00000219476	SSCC
[truncated: 82 more rows]
